1 A polysaccharide deacetylase enhances bacterial adhesion in high ionic strength environments

2

3 Nelson K. Chepkwony and Yves V. Brun\*

4

5 Département de microbiologie, infectiologie et immunologie, Université de Montréal, C.P. 6128,

6 succ. Centre-ville, Montréal (Québec) H3C 3J7, Canada

7

8 Running title: Deacetylation of holdfast polysaccharides augments binding in high ionic strength

9

10 \*Address correspondence to Yves V. Brun, [yves.brun@umontreal.ca](mailto:yves.brun@umontreal.ca)

11

12 Keywords: Marine Caulobacterales, Holdfast, Bacterial adhesin, Biofilm, Environmental

13 adaptation, Polysaccharides deacetylation, Ionic strength.

## 14 **SUMMARY**

15           The adhesion of organisms to surfaces in aquatic environments provides a diversity of  
16 benefits such as better access to nutrients or protection from the elements or from predation.  
17 Differences in ionic strength, pH, temperature, shear forces, and other environmental factors  
18 impact adhesion and organisms have evolved various strategies to optimize their adhesins for  
19 their specific environmental conditions. We know essentially nothing about how bacteria evolved  
20 their adhesive mechanisms to attach efficiently in environments with different physico-chemical  
21 conditions. Many species of Alphaproteobacteria, including members of the order  
22 *Caulobacterales*, use a polar adhesin, called holdfast, for surface attachment and subsequent  
23 biofilm formation in both freshwater and marine environments. *Hirschia baltica*, a marine member  
24 of *Caulobacterales*, produces a holdfast adhesin that tolerates a drastically higher ionic strength  
25 than the holdfast produced by its freshwater relative, *Caulobacter crescentus*. In this work, we  
26 show that the holdfast polysaccharide deacetylase HfsH plays an important role in adherence in  
27 high ionic strength environments. We show that deletion of *hfsH* in *H. baltica* disrupts holdfast  
28 binding properties and structure. Increasing expression of HfsH in *C. crescentus* improved  
29 holdfast binding in high salinity, whereas lowering HfsH expression in *H. baltica* reduced holdfast  
30 binding at high ionic strength. We conclude that HfsH plays a role in modulating holdfast binding  
31 at high ionic strength and hypothesize that this modulation occurs through varied deacetylation of  
32 holdfast polysaccharides.

33

## 34 INTRODUCTION

35 The development of adhesives that perform well on wet surfaces has been a challenge for  
36 centuries, yet this problem has been solved multiple times during the evolution of sessile aquatic  
37 organisms. These organisms derive multiple benefits from their adhesion to surfaces in aquatic  
38 environments such as increased access to nutrients, aerated water, and protection from  
39 predation. Aquatic environments can differ in ionic strength, pH, temperature, and shear forces,  
40 requiring the evolution of environment-optimized adhesion strategies. For example, mussels, a  
41 diverse group of bivalve mollusk species, can attach to surfaces in freshwater, brackish waters,  
42 and marine habitats, suggesting a successful evolution of adhesion mechanisms adapted to  
43 different ionic environments.<sup>1,2</sup> Both marine and freshwater mussels produce a fibrous polymeric  
44 adhesin structure called the byssus for surface attachment.<sup>1,2</sup> Mussel byssus-mediated adhesion  
45 is one of the best characterized systems for how adhesins interact with wet surfaces in both low  
46 and high ionic strength environments.<sup>2,3</sup>

47 The byssus adhesin contains more than 15 mussel foot proteins (Mfps).<sup>3</sup> Mfp-3 and Mfp-  
48 5 contain several 3,4-dihydroxyphenyl-L-alanine (DOPA) residues, a post-translational  
49 hydroxylation of tyrosine that promotes byssal adhesiveness and cohesiveness through hydrogen  
50 bonding and oxidative cross-linking.<sup>2-4</sup> Mfp-3 and Mfp-5 are also rich in lysine residues, which are  
51 frequently adjacent to DOPA residues on the protein backbone.<sup>1,3</sup> Marine mussel Mfps have more  
52 DOPA residues than freshwater species (11 - 30% mol in marine vs 0.1 - 0.6% mol in freshwater),  
53 which is hypothesized to contribute to overcoming the binding inhibition posed by high ionic  
54 strength in marine waters.<sup>5-8</sup> The synergy between the DOPA and lysine residues is thought to  
55 improve adhesion in marine environments by displacing hydrated salt ions from the surface and  
56 increasing electrostatic interactions.<sup>1-3</sup> Despite the impressive progress in understanding the  
57 mechanistic basis for mussel adhesion in different ionic strength environments, the lack of a  
58 genetic system has made it difficult to study the evolution of those mechanisms.

59 Here, we use genetically tractable, related freshwater and marine species of the order  
60 *Caulobacterales* to investigate the evolution of adhesion in these two environments. Most bacteria  
61 spend their lives attached to or associated with surfaces. Bacteria attach to surfaces using  
62 adhesins, which are mainly composed of polysaccharides, DNA, and/or proteins.<sup>9, 10</sup> The  
63 mechanism by which adhesins interact with different surfaces is still unclear, but studies have  
64 shown that electrostatic interactions play an important role.<sup>11-14</sup> In marine environments, bacterial  
65 adhesins face high ionic strengths, up to 600 mM, compared to ~ 0.05 mM in freshwater lakes  
66 and ponds.<sup>14, 15</sup> Nevertheless, marine bacteria attach efficiently to surfaces in the ocean, despite  
67 shielding of electrostatic forces that contribute to surface adhesion in high ionic strength  
68 environments.<sup>16, 17</sup> Therefore, bacteria living in such environments must use adhesins that are  
69 adapted to binding at high ionic strength.

70 Species in the order *Caulobacterales* are found as surface-attached cells growing in  
71 diverse environment. Their natural habitat ranges from freshwater and marine aquatic  
72 environments to nutrient-rich soil and the rhizosphere.<sup>18, 19</sup> Cells attach permanently to surfaces  
73 using a specialized polar adhesin called holdfast.<sup>19, 20</sup> *Caulobacter crescentus*, a freshwater  
74 member of the *Caulobacterales*, is a stalked bacterium with a dimorphic cell cycle that fluctuates  
75 between a flagellated, motile swarmer and a sessile stalked cell.<sup>19</sup> A swarmer cell differentiates  
76 into a stalked cell by shedding its flagellum and synthesizing holdfast-tipped stalk at the same  
77 pole (Fig. 1A). Although the exact composition of the *C. crescentus* holdfast is unknown, it has  
78 been shown to contain the monosaccharides *N*-acetylglucosamine (GlcNAc), glucose, 3-*O*-  
79 methylglucose, mannose, and xylose,<sup>20, 21</sup> as well as proteins and DNA.<sup>22</sup> The *C. crescentus*  
80 holdfast attaches to surfaces with a strong adhesive force of 70 N/mm<sup>2</sup>.<sup>23, 24</sup>

81 *Caulobacterales* use similar genes to synthesize, export, and anchor the holdfast,<sup>9, 25</sup> yet  
82 there are substantial differences in holdfast binding properties at high ionic strength. Most studies  
83 of holdfast properties have been performed in the freshwater *C. crescentus*,<sup>10</sup> in which as little as

84 10 mM NaCl leads to a 50% reduction in binding to glass.<sup>23</sup> Recently, we studied a marine  
85 *Caulobacterales Hirschia baltica*, which produces holdfast at the cell pole and uses the stalk for  
86 budding<sup>25</sup> (Fig. 1B). *H. baltica* produces holdfasts that tolerate a significantly higher ionic strength  
87 than *C. crescentus* holdfast, where 600 mM NaCl was required to observe a 50% decrease in  
88 binding to glass.<sup>25</sup> Differences in holdfast tolerance of ionic strength could result from differences  
89 in molecular composition or degree or type of modification.

90 Two holdfast modifying enzymes that have been characterized in the freshwater *C.*  
91 *crescentus* are the putative acetyltransferase, HfsK,<sup>26</sup> and the putative polysaccharide  
92 deacetylase, HfsH.<sup>27</sup> Deletion of *hfsK* or *hfsH* reduces holdfast cohesiveness (holdfast  
93 intramolecular interactions) and adhesiveness (holdfast-surface interactions), which leads to  
94 shedding of holdfasts into the medium.<sup>26, 27</sup> This shedding phenotype is similar to that observed  
95 in mutants lacking holdfast anchor proteins.<sup>28, 29</sup> Furthermore, overexpression of HfsH in *C.*  
96 *crescentus* increases cell adhesion without increasing the amount of holdfast produced,<sup>27</sup>  
97 implying that not all sugar subunits are deacetylated in wild-type (WT) holdfast. Interestingly,  
98 studies on deacetylation of the GlcNAc polymer chitin indicate that removal of acetyl groups  
99 leaves the resultant chitosan with an exposed amine group.<sup>30</sup> The level of deacetylation of  
100 chitosan changes its physical and chemical properties by altering electrostatic interactions, acid-  
101 base interactions, hydrogen bonds, and hydrophobic interactions with surfaces.<sup>30</sup> Therefore, we  
102 hypothesized that the partial positive charge on the primary amine formed after deacetylation of  
103 the holdfast GlcNAc polysaccharide by HfsK and/or HfsH might play a role in improving holdfast  
104 binding in high ionic strength environments.

105 In the present study, we show that the polysaccharide deacetylase HfsH is required for *H.*  
106 *baltica* adhesion and holdfast binding. We demonstrate that holdfast produced by a *H. baltica*  
107  $\Delta hfsH$  mutant is deficient in both cohesive and adhesive properties. *H. baltica*  $\Delta hfsH$  produces a  
108 similar quantity of holdfast polysaccharide as the WT, but due to a lack of cohesiveness and

109 adhesiveness, these holdfasts disperse into the medium. Furthermore, we demonstrate that  
110 holdfast binding can be modulated by varying the level of expression of HfsH. In *C. crescentus*,  
111 overexpression of HfsH increases ionic strength tolerance of holdfasts, while reducing expression  
112 of HfsH in *H. baltica* results in reduced ionic strength tolerance. Finally, we show that *H. baltica*  
113 HfsH helps to maintain the integrity of the holdfast structure, as holdfasts produced by a *H. baltica*  
114  $\Delta hfsH$  mutant lose their protein and galactose constituents. Collectively our results suggest that  
115 modulation of the level of the holdfast polysaccharide deacetylase HfsH is an important adaptation  
116 for adherence in high ionic strength environments.

117

118

119

## 120 RESULTS

### 121 The holdfast polysaccharide deacetylase HfsH is required for adhesion and biofilm 122 formation in *H. baltica*

123 A putative acetyltransferase HfsK, and a polysaccharide deacetylase, HfsH modulate *C.*  
124 *crescentus* holdfast binding properties.<sup>26, 27</sup> In *C. crescentus*, deacetylation of holdfast  
125 polysaccharides is important for both the cohesiveness and adhesiveness of holdfast.<sup>27</sup> In our  
126 previous work comparing *H. baltica* and *C. crescentus* holdfasts,<sup>25</sup> we showed that both species  
127 use similar genes to synthesize, export, and anchor holdfast to the cell envelope. We identified  
128 *H. baltica* genes that modify holdfast in *C. crescentus*, namely the putative acetyltransferase *hfsK*  
129 (*hbaL\_0069*) and the polysaccharide deacetylase *hfsH* (*hbaL\_1965*; Fig. 2A). In *C. crescentus*, the  
130 *hfsK* gene as well as its paralogs *CC\_2277* and *CC\_1244* are found outside the core *hfs* locus  
131 (Fig. 2A). Similar to *C. crescentus*, the *H. baltica* *hfsK* gene and its paralogs *hbaL\_1607* and  
132 *hbaL\_1184* are also found outside the *hfs* locus (Fig. 2A). BLAST analysis did not identify any  
133 additional *hfsK* paralogs in *H. baltica*.

134 We showed that HfsK is not required for holdfast synthesis, anchoring to the cell envelope,  
135 and biofilm formation (see supplementary materials and Fig. S1). Next, we examined the role of  
136 the polysaccharide deacetylase HfsH (*HbaL\_1965*) in *H. baltica* biofilm formation by generating  
137 an in-frame deletion mutant of *hfsH*. *H. baltica*  $\Delta hfsH$  was deficient in biofilm formation, similarly  
138 to a holdfast null strain  $\Delta hfsA$  (Fig. 2B), and this phenotype could be restored by complementation  
139 in *trans* by a replicating plasmid encoding a copy of the *H. baltica* *hfsH* gene under the control of  
140 its native promoter (Fig. 2B). These results show that the polysaccharide deacetylase HfsH plays  
141 a significant role in biofilm formation in *H. baltica*.

142 As holdfast is required for biofilm formation in *C. crescentus* and *H. baltica*,<sup>20, 25, 31</sup> we  
143 probed for the presence of holdfasts using fluorescent Alexa Fluor 488 (AF488) conjugated wheat  
144 germ agglutinin (WGA) lectin that specifically binds to the GlcNAc component of the holdfast  
145 polysaccharide.<sup>20</sup> In exponentially growing planktonic cultures, *C. crescentus* WT cells produced

146 holdfasts that bound AF488-WGA and formed cell-cell aggregates mediated by holdfasts, called  
147 rosettes (Fig. 2C, left panel). *C. crescentus*  $\Delta hfsH$  produced holdfasts which associated with the  
148 cell or were shed into the medium, as previously shown.<sup>27</sup> In planktonic culture, *H. baltica* WT  
149 formed rosettes and produced holdfasts that bound AF488-WGA and are associated to the cells  
150 (Fig. 2C, right panel). *H. baltica*  $\Delta hfsH$  did not form rosettes, and only 6 % of the cells showed  
151 some AF488-WGA staining, while many had no AF488-WGA staining similarly to holdfast null  
152 mutant  $\Delta hfsA$ , suggesting that no holdfast was associated with these cells (Fig. 2C, right panel,  
153 white arrows). Furthermore, we did not observe shed holdfast in the medium from *H. baltica*  $\Delta hfsH$   
154 (Fig. 2C, right panels), which contrasts with the *C. crescentus*  $\Delta hfsH$  phenotype (Fig. 2C, left  
155 panels, white and blue arrows). Holdfast and rosette formation could be restored in the  $\Delta hfsH$   
156 mutants by complementing in *trans* with a replicating plasmid encoding a copy of the *hfsH* gene  
157 (Fig. S2B). We observed that *C. crescentus*  $\Delta hfsH$  produced small holdfasts which bound to  
158 coverslips (Fig. 2D, left panels, blue arrows) but failed to anchor the cells (3% of WT, Fig. 2D), as  
159 previously shown.<sup>27</sup> In contrast, *H. baltica*  $\Delta hfsH$  cells did not bind to the coverslip and we could  
160 not detect AF488-WGA labeling on the coverslip surface similarly to a holdfast null mutant  $\Delta hfsA$   
161 (Fig. 2D, right panel), suggesting that holdfasts failed to attach to the glass surface.

162 HfsH is a predicted carbohydrate esterase family 4 (CE4) enzyme.<sup>27</sup> The CE4 family of  
163 polysaccharide deacetylases have five catalytic motifs for substrate and co-factor binding, as well  
164 as those that participate directly in the catalytic mechanism,<sup>32</sup> which are all present in *C.*  
165 *crescentus* HfsH,<sup>27</sup> and in *H. baltica* HfsH (Fig. S2D). In order to test if *H. baltica* HfsH is a holdfast  
166 polysaccharide deacetylase, we engineered a point mutation in a key substrate-binding residue,  
167 resulting in an amino acid change from aspartic acid to alanine at position 43 (D43A; Fig. S2D,  
168 asterisk). We monitored for the presence of holdfast using fluorescence microscopy with AF488-  
169 WGA. Introduction of D43A in the *H. baltica* *hfsH* gene phenocopied the *hfsH* deletion (Fig. 2E,  
170 white arrows). We complemented the  $\Delta hfsH$  mutant with a WT copy of *hfsH*, or with the point



171 mutant *hfsH<sub>D43A</sub>*, expressed under the native promoter on a low copy replicating plasmid (pMR10).  
172 Although WT *hfsH* and *hfsH<sub>D43A</sub>* were expressed similarly (Fig. S2E), complementation with the  
173 WT allele restored AF488-WGA holdfast labeling in the  $\Delta hfsH$  mutant background, while the point  
174 mutant *hfsH<sub>D43A</sub>* did not (Fig. 2E). These results confirm that *H. baltica* HfsH is involved in holdfast  
175 biogenesis and that D43 is important for its activity, similarly to *C. crescentus* HfsH.<sup>27</sup>

176 The above results indicate that HfsH plays an important role in *H. baltica* holdfast  
177 properties, including their anchoring to the cell envelope. We hypothesized that (1) *H. baltica*  
178  $\Delta hfsH$  produces a small amount of holdfast polysaccharide that is insufficient to anchor the cell to  
179 the surface, similarly to the under-expression of a glycosyltransferase HfsL,<sup>25</sup> or (2) holdfasts  
180 produced by *H. baltica*  $\Delta hfsH$  are deficient in adhesion and/or cohesion and are thus dispersed  
181 into the medium.

182

### 183 **Holdfast produced by *H. baltica* $\Delta hfsH$ forms thread-like fibers that diffuse into the medium**

184 The deacetylase mutant *H. baltica*  $\Delta hfsH$  showed a more severe holdfast attachment  
185 deficiency compared to *C. crescentus*  $\Delta hfsH$  (Fig. 2C-D). Although we did not observe any  
186 holdfast binding to glass coverslips for the *H. baltica*  $\Delta hfsH$  mutant, cells grown planktonically had  
187 a faint AF488-WGA labeling (Fig. 2C). These results prompted us to perform time-lapse  
188 microscopy to better understand production of holdfast by *H. baltica*  $\Delta hfsH$ . To visualize holdfast  
189 production, we spotted exponential-phase cells on top of a soft agarose pad containing AF488-  
190 WGA and collected images every 5 min for 12 h. We observed that *H. baltica* WT produced  
191 holdfasts that were labelled with AF488-WGA (Fig. 3A, upper panels) and that the  $\Delta hfsH$  mutant  
192 initially produced holdfasts similarly to WT (Fig. 3A, lower panels). However, the holdfasts  
193 produced by *H. baltica*  $\Delta hfsH$  appeared more diffuse compared to WT over time (Fig. 3A and  
194 Movie S1A-B). These results show that *H. baltica*  $\Delta hfsH$  produces holdfast material, indicating  
195 that HfsH is not essential for holdfast synthesis.

196 In order to test how holdfast produced by *H. baltica*  $\Delta hfsH$  interacts with a glass surface,  
197 we performed time-lapse microscopy using a microfluidic device with a low flow rate (1.4  $\mu\text{l}/\text{min}$ ).  
198 We injected exponential-phase cells mixed with AF488-WGA into the microfluidic chamber, turned  
199 off the flow, and imaged the cells every 20 sec for 5.5 h. In the microfluidic chamber, we observed  
200 that *H. baltica* WT cells arrived at the glass surface and produced holdfasts, allowing them to  
201 remain bound to the surface (Fig. 3B, upper panels and Movie S1C). In contrast, *H. baltica*  $\Delta hfsH$   
202 produced holdfasts that did not remain cohesive on the glass surface and instead formed thread-  
203 like fibers (Fig. 3B, lower panel and Movie S1D). These results indicate that HfsH in *H. baltica* is  
204 not required for holdfast synthesis, but is essential for maintenance of holdfast cohesive  
205 properties.

206

#### 207 **HfsH expression correlates with the level of biofilm formation**

208 In order to understand the role of HfsH in *H. baltica*, we investigated whether varying the  
209 level of its expression in *H. baltica* affects holdfast cohesive and adhesive properties. We used a  
210 copper inducible promoter to tightly control the level of *hfsH* expression<sup>25</sup> (Fig. 4A). The ability to  
211 tightly regulate the expression levels of HfsH under the control of  $P_{Cu}$  was validated by western  
212 blot analysis (Fig. S3). We quantified the amount of biofilm formed after 4 h of *hfsH* induction with  
213 different concentrations of  $\text{CuSO}_4$  as an inducer of *hfsH* expression. Our results showed that the  
214 level of *hfsH* expression in *H. baltica* correlated logarithmically with the relative level of biofilm  
215 formed (Fig. 4B). At the highest level of induction at 250  $\mu\text{M}$   $\text{CuSO}_4$ , we observed full restoration  
216 of biofilm formation to WT levels (Fig. 4B).

217 We next labelled holdfasts with AF488-WGA to analyze the effect of varying HfsH  
218 expression on *H. baltica* holdfast production. We induced the expression of HfsH for 2 h in *H.*  
219 *baltica*  $\Delta hfsH P_{Cu}\text{-}hfsH$  using 0 to 250  $\mu\text{M}$   $\text{CuSO}_4$ , and visualized holdfasts of planktonic cells with  
220 AF488-WGA by fluorescence microscopy. Addition of  $\text{CuSO}_4$  to *H. baltica* WT and *H. baltica*

221  $\Delta hfsH$  with empty vector controls had no effect on cell anchoring or holdfast surface adhesion  
222 (Fig. 4C, upper and middle panels). In the *H. baltica*  $\Delta hfsH$  mutant complemented with  $P_{Cu}-hfsH$ ,  
223 we observed a small area of AF488-WGA staining on cells and shed holdfasts in the medium at  
224 the lowest level of *hfsH* induction (10  $\mu$ M  $CuSO_4$ ; Fig. 4C, lower panels, blue arrow). As we  
225 increased the level of *hfsH* expression, we observed increasing levels of AF488-WGA labeling  
226 co-localized with cells (15% at 0  $\mu$ M  $CuSO_4$  to 95% at 250  $\mu$ M  $CuSO_4$  compared to WT, Fig. 4C,  
227 lower panels). At intermediate levels of *hfsH* expression (50  $\mu$ M  $CuSO_4$ ), we observed cells with  
228 labeled holdfasts but fewer rosettes compared to full induction at 250  $\mu$ M  $CuSO_4$  (6% at 50  $\mu$ M  
229  $CuSO_4$  to 95% at 250  $\mu$ M  $CuSO_4$ , Fig. 4C, lower panels). At the highest level of induction (250  $\mu$ M  
230  $CuSO_4$ ), we observed cells in rosettes and holdfast formation similar to WT (Fig. 4C, lower panels,  
231 white arrow), suggesting that holdfast properties were fully restored at this level of HfsH  
232 expression.

233 To test if HfsH expression levels correlate with holdfast cohesiveness and adhesiveness,  
234 we performed time-lapse microscopy on *H. baltica*  $\Delta hfsH$  complemented with  $pMR10::P_{Cu}-hfsH$   
235 grown in a microfluidic device. We induced the expression of HfsH for 2 h in liquid cultures,  
236 injected exponential-phase induced cells mixed with AF488-WGA into the microfluidic chamber,  
237 and turned off the flow for 30 min to allow for binding to the chamber surface. We then adjusted  
238 the flow rate to 1.4  $\mu$ l/min and imaged the cells every 20 sec for 30 min. *H. baltica*  $\Delta hfsH$   
239  $pMR10::P_{Cu}-hfsH$  grown without  $CuSO_4$  produced small holdfasts that adhered to the chamber,  
240 but were unable to anchor the cells to the surface once flow was turned back on (Fig. 4D, upper  
241 panels and Movie S2A). Furthermore, holdfast material that was initially attached to the surface  
242 was subsequently washed away upon initiation of fluid flow, suggesting an adhesion defect (Fig.  
243 4D, upper panels, blue arrows). At 50  $\mu$ M  $CuSO_4$ , we observed a partial restoration of holdfast  
244 adhesiveness and cohesiveness as cells were able to stay attached to the surface for longer after  
245 re-initiation of the flow, however holdfast adhesiveness was still impaired as shed holdfasts could

246 be easily washed off the surface (Fig. 4D, middle panels, blue arrows and Movie S2B). At 250  $\mu$ M  
247  $\text{CuSO}_4$ , we observed full restoration of holdfast adherence, cell anchoring, and the formation of  
248 rosettes (Fig. 4D, lower panels and Movie S2C). These results suggest that at lower levels of  
249 HfsH expression holdfast binding properties are only partially restored, while at higher levels of  
250 expression holdfast adhesiveness and cohesiveness are fully restored.

251

### 252 **Overexpression of HfsH increases biofilm formation in *C. crescentus* but not in *H. baltica***

253 *C. crescentus* holdfast binding properties can be increased by overexpressing HfsH,<sup>27</sup>  
254 implying that holdfast polysaccharides are partially deacetylated. *C. crescentus*  $\Delta hfsH$  and *H.*  
255 *baltica*  $\Delta hfsH$  showed important differences in their holdfast structure and binding properties (Fig.  
256 2C-D). Therefore, we hypothesized that there could be differences in the level of holdfast  
257 polysaccharide deacetylation among the *Caulobacteriales* species. Unfortunately, because it is  
258 produced in such small quantities, it is not currently possible to directly determine the level of  
259 deacetylation in holdfast. As an alternative, we examined the effect of varying the level of HfsH  
260 expression on holdfast adhesive properties. We first tested whether heterologous expression of  
261 HfsH in each species would alter holdfast properties. We made two types of cross-  
262 complementation constructs for each respective host species: (1) native levels of *hfsH* expression  
263 driven by the *hfsH* promoter ( $P_{hfsH_{CC}}$  for *C. crescentus*  $\Delta hfsH$  and  $P_{hfsH_{HB}}$  for *H. baltica*  $\Delta hfsH$ ),  
264 and (2) *hfsH* overexpression driven by the inducible xylose promoter ( $P_{xyl_{CC}}$  and  $P_{xyl_{HB}}$ ; Fig. 5A).  
265 We analyzed the level of HfsH expression by western blot analysis and found that both HfsH<sub>HB</sub>  
266 and HfsH<sub>CC</sub> were equally expressed from these promoters (Fig. S4).

267 To test whether the cross-complemented strains restored biofilm formation, we quantified  
268 biofilm formed after 12 h (Fig. 5B). When we examined cross-complemented strains with HfsH  
269 under the control of the native promoter  $P_{hfs}$ , we observed that  $P_{hfs_{CC}}-hfsH_{HB}$  restored biofilm  
270 formation to WT levels in *C. crescentus*  $\Delta hfsH$  (Fig. 5B). In contrast,  $P_{hfs_{HB}}-hfsH_{CC}$  restored biofilm

271 formation to only 20 % of WT levels in *H. baltica*  $\Delta hfsH$  (Fig. 5B). When *hfsH<sub>HB</sub>* was overexpressed  
272 in *C. crescentus* from the *P<sub>xylCC</sub>* promoter (*C. crescentus*  $\Delta hfsH$  *P<sub>xylCC</sub>-hfsH<sub>HB</sub>*), biofilm formation  
273 was increased to 150% of WT levels (Fig. 5B), similar to what has been observed with  
274 overexpression of *HfsH<sub>CC</sub>* in *C. crescentus*.<sup>27</sup> Overexpression of *HfsH<sub>CC</sub>* using *P<sub>xylHB</sub>* in *H. baltica*  
275  $\Delta hfsH$  (*H. baltica*  $\Delta hfsH$  *Phfs<sub>HB</sub>-hfsH<sub>CC</sub>*) restored biofilm to WT levels (Fig. 5B). These results  
276 suggest that *HfsH<sub>HB</sub>* may have higher levels of enzymatic activity than *HfsH<sub>CC</sub>*.

277 To analyze how cross-complementation of *HfsH* affects holdfast cohesion and anchoring,  
278 we labelled holdfasts from planktonic cultures with AF488-WGA. *C. crescentus*  $\Delta hfsH$  *Phfs<sub>CC</sub>-*  
279 *hfsH<sub>HB</sub>* holdfasts were labelled with AF488-WGA and formed rosettes similar to the WT (95% of  
280 WT, Fig. 5C, left panels). In *H. baltica*  $\Delta hfsH$  *Phfs<sub>HB</sub>-hfsH<sub>CC</sub>* we observed that approximately half  
281 of the stalked cells were labelled with AF488-WGA, however this labelling was weaker than the  
282 WT (50% of WT, Fig. 5C, right panels). These results indicate that *Phfs<sub>CC</sub>-hfsH<sub>HB</sub>* fully cross-  
283 complements *C. crescentus*  $\Delta hfsH$ , while *Phfs<sub>HB</sub>-hfsH<sub>CC</sub>* only partially cross-complements *H.*  
284 *baltica*  $\Delta hfsH$ . These results are in agreement with our observations for biofilm formation for these  
285 strains (Fig. 5B).

286 Since only half of *H. baltica*  $\Delta hfsH$  *Phfs<sub>HB</sub>-hfsH<sub>CC</sub>* cells had faint AF488-WGA labelling and  
287 surface binding properties were not fully restored to WT levels (Fig. 5C, right panels), we  
288 hypothesized that holdfasts produced by this mutant may have been shed into the medium.  
289 Therefore, we tested whether the holdfast produced by this strain can bind to a glass surface by  
290 incubating cells on a coverslip at room temperature for 1 h. After incubation, unattached cells  
291 were washed off and AF488-WGA was added to label any holdfast bound to the coverslip. As  
292 expected, *C. crescentus*  $\Delta hfsH$  cross-complemented with *Phfs<sub>CC</sub>-hfsH<sub>HB</sub>* produced holdfasts that  
293 bound to the coverslip and anchored the cells to the surface, like WT (Fig. 5D, left panels). We  
294 observed that holdfasts produced by *H. baltica*  $\Delta hfsH$  *Phfs<sub>HB</sub>-hfsH<sub>CC</sub>* were not able to anchor the  
295 cells to the glass surface, although these holdfasts were able to bind to the coverslip (Fig. 5D,

296 right panels). These results imply that expression of HfsH<sub>CC</sub> from the *H. baltica* *hfsH* promoter  
297 was sufficient for restoration of holdfast surface binding by *H. baltica*, but insufficient to maintain  
298 interactions with the cell body. In addition, overexpression of either HfsH<sub>CC</sub> or HfsH<sub>HB</sub> in *C.*  
299 *crenscentus*  $\Delta hfsH$  and *H. baltica*  $\Delta hfsH$  using P<sub>Xyl</sub> restored holdfast binding properties to WT  
300 levels (Fig. 5E). These results suggest either that HfsH<sub>HB</sub> and HfsH<sub>CC</sub> have different levels of  
301 enzymatic activity or that their ability to deacetylate *H. baltica* holdfast is different, which could be  
302 contributing to the observed differences in *C. crescentus* and *H. baltica* holdfast binding  
303 properties.

304

### 305 **Increased HfsH expression improves binding in high ionic strength environments**

306 In order to test whether HfsH plays an important role in holdfast binding at high ionic  
307 strength, we quantified binding of holdfasts purified from *C. crescentus* overexpressing HfsH<sub>CC</sub>  
308 using the xylose promoter (P<sub>Xyl</sub><sub>CC</sub>-*hfsH*<sub>CC</sub>). To obtain cell-free holdfast samples and study holdfast  
309 without the contribution of the cell body, a holdfast-shedding mutation,  $\Delta hfaB$ , was used as shown  
310 on Fig. 6A.<sup>29, 33</sup> Holdfasts from *C. crescentus*  $\Delta hfaB$   $\Delta hfsH$  P<sub>Xyl</sub><sub>CC</sub>-*hfsH*<sub>CC</sub> (Fig. 6B, green line)  
311 tolerated higher ionic strengths than holdfasts purified from the control *C. crescentus*  $\Delta hfaB$  strain  
312 (Fig. 6B, blue dashed line). These results suggest that increased expression of HfsH in *C.*  
313 *crenscentus* improves ionic strength tolerance. When we overexpressed HfsH<sub>HB</sub> in *C. crescentus*  
314  $\Delta hfaB$   $\Delta hfsH$ , we observed an increase in ionic strength tolerance similar to overexpression of  
315 HfsH<sub>CC</sub>, but not to the level observed in *H. baltica* (Fig. 6B, red, green and yellow lines). Our  
316 results suggest that holdfast polysaccharide deacetylation plays an important role in improving  
317 holdfast ionic strength tolerance, but it is not the only factor as increased HfsH<sub>CC</sub> or HfsH<sub>HB</sub>  
318 expression did not elevate *C. crescentus* holdfast binding to the level of *H. baltica*.

319 We next examined the effect of cross-complementation with HfsH<sub>CC</sub> in *H. baltica*. We had  
320 observed that expression of HfsH<sub>CC</sub> in *H. baltica*  $\Delta hfsH$  from P<sub>hfs</sub><sub>HB</sub> failed to restore holdfast

321 binding, but its overexpression using *P<sub>xyl</sub>* restored surface binding to the level observed in the  
322 WT (Fig. 5A-B). Therefore, we tested how holdfasts purified from *H. baltica*  $\Delta hfaB$  overexpressing  
323 HfsH<sub>CC</sub> responded to ionic strength. *H. baltica*  $\Delta hfaB$   $\Delta hfsH$  *P<sub>xyl</sub>*<sub>HB</sub>-*hfsH*<sub>CC</sub> produced holdfasts that  
324 bound to glass slides to the same degree as holdfasts produced by control *H. baltica*  $\Delta hfaB$   
325 expressing regular levels of HfsH<sub>HB</sub> (Fig. 6C, black dashed line and blue line). We also quantified  
326 holdfast binding from *H. baltica*  $\Delta hfaB$  overexpressing HfsH<sub>HB</sub> and did not observe a further  
327 increase in ionic strength tolerance (Fig. 6C, red line). These results suggest that *H. baltica*  
328 holdfasts either: (1) have maximized binding at native levels of HfsH<sub>HB</sub> expression, or (2) have  
329 maximized holdfast deacetylation and further increases in HfsH<sub>HB</sub> expression have no observable  
330 effects on holdfast binding.

331 We hypothesized that if increasing the level of HfsH expression increases *C. crescentus*  
332 holdfast binding at high ionic strength, then reducing the level of HfsH expression in *H. baltica*  
333 holdfast could reduce the ionic strength tolerance. To test this, we used the copper inducible  
334 promoter *P<sub>Cu</sub>* to control the expression of HfsH in *H. baltica*  $\Delta hfaB$   $\Delta hfsH$ . We observed few  
335 holdfasts bound to the glass slide when HfsH<sub>CC</sub> or HfsH<sub>HB</sub> expression was not induced (Fig. 6D,  
336 maroon and black lines). However, at the highest level of induction of HfsH<sub>HB</sub> and HfsH<sub>CC</sub> (250  
337  $\mu$ M CuSO<sub>4</sub>), we observed full restoration of ionic strength tolerance (Fig. 6D, red and green lines).  
338 Next, we analyzed holdfast binding at an intermediate level of induction (50  $\mu$ M CuSO<sub>4</sub>) because  
339 at this level of expression, we had observed 50% biofilm restoration and restoration of holdfast  
340 structure (Fig. 4B and S5A). Using Western blot analysis, we compared the level of expression of  
341 HfsH<sub>HB</sub> and HfsH<sub>CC</sub> at 50  $\mu$ M CuSO<sub>4</sub> and observed that they were expressed at similar levels (Fig.  
342 S5B). At intermediate levels of induction of HfsH<sub>HB</sub>, we observed a decrease in holdfast ionic  
343 strength tolerance compared to induction at 250  $\mu$ M CuSO<sub>4</sub> (Fig. 6D, purple curve). We observed  
344 a further decrease in holdfast ionic strength tolerance when HfsH<sub>CC</sub> was induced with 50  $\mu$ M  
345 CuSO<sub>4</sub> compared to HfsH<sub>HB</sub> (Fig. 6D, blue and purple curves). The effect of reducing HfsH

346 expression was larger at high ionic strength than at low ionic strength, suggesting that holdfast  
347 polysaccharide deacetylation may play an important role in promoting holdfast binding at high  
348 ionic strength (Fig. 6D). These results suggest that HfsH<sub>HB</sub> likely deacetylates *H. baltica* holdfast  
349 more efficiently than HfsH<sub>CC</sub> and that marine *Caulobacterales* have optimized HfsH to augment  
350 holdfast binding at high ionic strength.

351

### 352 **HfsH is required for retention of holdfast thiols and galactose monosaccharides**

353 In addition to polysaccharides, the *H. baltica* holdfast contain free thiol groups, suggesting  
354 that it contains proteins.<sup>25</sup> Holdfast thiols require the presence of holdfast polysaccharides for cell  
355 association, as deletion of the glycosyltransferases essential for holdfast polysaccharide  
356 synthesis leads to loss of both holdfast polysaccharides and thiols.<sup>25</sup> In addition to GlcNAc, *H.*  
357 *baltica* holdfasts contain galactose monosaccharides.<sup>25</sup> In order to gain insights into how HfsH  
358 modifies holdfast properties, we analyzed its impact on these holdfast components.

359 In order to test whether holdfast thiols are present in the deacetylase mutant *H. baltica*  
360  $\Delta hfsH$ , we co-labeled exponential-phase cells with both AF488-WGA (green, GlcNAc) and AF594  
361 conjugated to maleimide (AF594-Mal), which reacts with free thiols molecules (red). As expected,  
362 the WT cells were labeled with both AF488-WGA and AF594-Mal (Fig. 7A, left panels), indicating  
363 the presence of both holdfast polysaccharides and thiols. In contrast, the deacetylase mutant *H.*  
364 *baltica*  $\Delta hfsH$  was not labelled with either AF488-WGA or AF594-Mal (Fig. 7A, right panels). We  
365 then varied the level of HfsH expression using *H. baltica*  $\Delta hfsH$   $P_{Cu}$ -*hfsH*. Addition of CuSO<sub>4</sub> to  
366 exponentially growing *H. baltica* WT cells with empty vector had no effect on labeling of holdfast  
367 polysaccharides (Fig. 7B, left panels). At the lowest level of induction (50  $\mu$ M CuSO<sub>4</sub>), *H. baltica*  
368  $\Delta hfsH$   $P_{Cu}$ -*hfsH* holdfasts were labeled only by AF488-WGA while AF594-Mal failed to label  
369 holdfasts (Fig. 7B, right panels). We observed restored AF594-Mal labeling at the highest level of  
370 HfsH induction (250  $\mu$ M CuSO<sub>4</sub>; Fig. 7B, right panels). These results indicate that HfsH expression



371 is required for thiols contained molecules to associate with GlcNAc polysaccharides in the  
372 holdfast.

373 In order to test the effect of *hfsH* deletion on retention of the galactose component of  
374 holdfast, we co-labeled the cells with AF488-WGA (specific to GlcNAc, green) and AF594-  
375 conjugated *Griffonia simplicifolia* lectin 1 (AF594-GSL-1, specific to galactose, red). *H. baltica* WT  
376 holdfast was labelled with both AF488-WGA and AF594-GSL-1, but *H. baltica*  $\Delta hfsH$  was not  
377 labeled with either AF594-GSL-1 or AF488-WGA (Fig. 7C). These results suggest that HfsH is  
378 also crucial for the retention of holdfast galactose components within the holdfast of *H. baltica*.

379

## 380 DISCUSSION

381 Bacterial adhesion is influenced by many variables, including adhesin composition,  
382 surface properties, and environmental factors such as pH, temperature, fluid shear, and ionic  
383 strength.<sup>10, 23, 34-36</sup> *C. crescentus*, a freshwater *Caulobacterales*, produces holdfasts that are  
384 sensitive to ionic strength, while holdfasts from the marine *H. baltica* tolerate a higher ionic  
385 strength.<sup>23, 25</sup> In this study, we examined the influence of specific enzymatic modifications on the  
386 differing holdfast properties of these species. Specifically, we described the contributions of the  
387 polysaccharide deacetylase HfsH to holdfast binding at high ionic strength by comparing holdfasts  
388 from the freshwater *C. crescentus* and the marine *H. baltica*. The degree of deacetylation modifies  
389 holdfast polysaccharide physicochemical properties by introducing a partially positive charge on  
390 the resultant amine group, which is important for holdfast cohesive and adhesive properties.<sup>27</sup>

391 Our results showed that HfsH is important for biofilm formation and holdfast binding  
392 properties in *H. baltica*. We found that the *H. baltica*  $\Delta hfsH$  mutant does not form rosettes or  
393 biofilms, and produces holdfasts that are impaired in surface binding and have a thread-like  
394 appearance, in contrast to the *C. crescentus*  $\Delta hfsH$  mutant, which sheds small holdfasts that are  
395 capable of binding to glass surfaces. These observations suggest that there are differences in the

396 role for holdfast deacetylation in *H. baltica* versus *C. crescentus*. These results also indicate that  
397 HfsH plays an important role in maintaining holdfast cohesive and adhesive properties in both  
398 species. It has been shown that polymers such as xylan and lignocellulose interact with surfaces  
399 using hydrogen bonds generated by deacetylation and the degree of deacetylation affects their  
400 interactions with polar surfaces.<sup>37</sup> The degree of deacetylation of other polysaccharides such as  
401 chitin/chitosan, a polymer of GlcNAc, is important in altering their physicochemical properties. For  
402 example, deacetylation of chitin to generate chitosan increases its pK<sub>a</sub> from 6.46 to 7.32.<sup>30</sup> This  
403 pK<sub>a</sub> change is due to an increase in free primary amines that are exposed by deacetylation. We  
404 believe that the polysaccharide deacetylase HfsH performs a similar function in modifying the  
405 holdfast polysaccharide.

406 Overexpression of HfsH<sub>CC</sub> in *C. crescentus* increases holdfast adhesion without an  
407 increase in the size of holdfast.<sup>27</sup> This suggests that *C. crescentus* holdfast polysaccharides are  
408 partially deacetylated and overexpression of HfsH<sub>CC</sub> further increases the degree of deacetylation,  
409 in turn enhancing adhesion. In *H. baltica*, overexpression of HfsH<sub>HB</sub> or HfsH<sub>CC</sub> did not increase  
410 surface adhesion compared to WT. One interpretation of these results is that *H. baltica* holdfast  
411 polysaccharides are fully deacetylated by native levels of HfsH expression, and thus  
412 overexpression of HfsH has no additional effect. Alternatively, *H. baltica* holdfast binding is  
413 already maximized for our test conditions and thus an increase in deacetylation has no further  
414 positive effect. We hypothesized that if *H. baltica* has maximized its holdfast polysaccharide  
415 deacetylation, expression of HfsH below native levels would lead to a reduction in holdfast ionic  
416 strength tolerance. We showed that the level of HfsH expression correlates with holdfast binding  
417 in *H. baltica*, suggesting that *H. baltica* is exploiting deacetylation to optimize its binding in high  
418 ionic strength environments. Our results showed that HfsH<sub>HB</sub> performs this function better than  
419 HfsH<sub>CC</sub>, suggesting that there could be differences in HfsH<sub>HB</sub> and HfsH<sub>CC</sub> enzymatic activities. *H.*  
420 *baltica* produces larger holdfasts than *C. crescentus* and they contain additional sugars such as

421 galactose,<sup>25</sup> therefore an alternative hypothesis is that *C. crescentus* HfsH<sub>CC</sub> might be less  
422 efficient at deacetylating *H. baltica* holdfast due to structural and compositional differences.

423 Interestingly, increasing expression of HfsH in *C. crescentus* leads to increased binding  
424 at high ionic strength. Cross-complementing *C. crescentus*  $\Delta hfsH$  with overexpressed HfsH<sub>HB</sub>  
425 produced holdfasts that had similar levels of increased ionic strength tolerance as those produced  
426 by overexpressed HfsH<sub>CC</sub> as compared to WT, suggesting that HfsH<sub>HB</sub> is capable of deacetylating  
427 *C. crescentus* holdfast polysaccharides. However, increased expression of HfsH<sub>HB</sub> did not  
428 increase *C. crescentus* holdfast binding at high ionic strength to the level of *H. baltica*, implying  
429 that other factors also contribute to ionic strength tolerance. When we reduced the expression of  
430 HfsH<sub>HB</sub> in *H. baltica*, we observed a decrease in ionic strength tolerance. A further decrease was  
431 observed when HfsH<sub>CC</sub> was expressed at the same intermediate level in *H. baltica* compared to  
432 HfsH<sub>HB</sub>. These results suggest that, for *H. baltica* holdfast to overcome high ionic strength, there  
433 is a minimum level of deacetylation of holdfast polysaccharides that must be attained.

434 How holdfast interacts with surfaces remains unclear, but an electrostatic mechanism has  
435 been suggested.<sup>23, 25</sup> *C. crescentus* holdfast binding is affected by pH and NaCl.<sup>23</sup> The mechanism  
436 by which NaCl disrupts electrostatic interactions between holdfast components and glass  
437 surfaces is unclear. High ionic strength has been shown to reduce the radius of the electrostatic  
438 force on a surface, which would lower the likelihood that holdfast polysaccharides are able to  
439 interact with the surface.<sup>16</sup> It is also known that increasing ionic strength has no effect on holdfast  
440 that are already attached to a surface,<sup>25</sup> suggesting that high ionic strength only impairs the initial  
441 interactions between the holdfast and the surface before a permanent bond is established. In  
442 *Pseudomonas putida*, it has been shown that high ionic strength alters the conformation of  
443 extracellular biopolymers.<sup>38, 39</sup> The polymer brush layer remains extended at low ionic strength,  
444 but upon an increase in ionic strength the brush layer becomes compacted, leading to an increase  
445 in the charge to mass ratio.<sup>38, 39</sup> This increase in charge to mass ratio ensures that the  
446 polysaccharides retain their electrostatic properties. This phenomenon could explain the need for

447 a higher level of deacetylation of holdfasts from marine species compared to those of freshwater  
448 species, as deacetylation increases the proportion of charges on holdfast polysaccharides, as  
449 required for surface interactions at high ionic strength.

450 We conclude that degree of holdfast polysaccharide deacetylation is important in holdfast binding  
451 at high ionic strengths, and that the marine *Caulobacterales* have optimized deacetylation to  
452 overcome holdfast binding challenges in these environments. Generally, it seems like the degree  
453 of holdfast deacetylation and the degree of DOPA incorporation into the Mfps are equivalent  
454 strategies to adapt to increased ionic strength. We showed that the *H. baltica*  $\Delta hfsH$  mutant lacks  
455 both galactose and thiol molecules, suggesting that these constituents require deacetylated  
456 holdfast to associate with the cell. Therefore, deacetylated GlcNAc, sugars other than GlcNAc,  
457 and/or putative thiol containing proteins might play a role in improving holdfast binding at high  
458 ionic strength. Validation of the presence of putative holdfast-associated proteins and their  
459 identification in *C. crescentus* and *H. baltica* will enable a better understanding of their role in  
460 holdfast binding in these environments.

## 461 **EXPERIMENTAL PROCEDURES**

### 462 **Bacterial strains and growth conditions**

463 The bacterial strains used in this study are listed in Table S1. *H. baltica* strains were grown  
464 in marine medium (Difco™ Marine Broth/Agar reference 2216) except when studying the effect of  
465 ionic strength on holdfast binding, where they were grown in Peptone Yeast Extract (PYE)  
466 medium<sup>19</sup> supplemented with 0 or 1.5% NaCl. *C. crescentus* was grown in PYE medium. Both *H.*  
467 *baltica* and *C. crescentus* strains were grown at 30 °C. When appropriate, kanamycin was added  
468 at 5 µg/ml to liquid medium and 20 µg/ml in agar plates. *H. baltica* strains with the copper inducible  
469 promoter were grown in marine broth supplemented with 0-250 µM of CuSO<sub>4</sub>. *H. baltica* strains  
470 with the xylose promoter were grown in marine broth supplemented with 0.03% xylose, while *C.*  
471 *crescentus* strains with the xylose promoter were grown in PYE broth supplemented with 0.03%  
472 xylose. *E. coli* strains were grown in lysogeny broth (LB) at 37 °C supplemented with 30 µg/ml of  
473 kanamycin in liquid medium or 25 µg/ml in agar plates, as appropriate.

474

### 475 **Strain construction**

476 All the plasmids and primers used in this study are listed in Table S1 and S2, respectively.  
477 In-frame deletion mutants were obtained by double homologous recombination as previously  
478 described<sup>40</sup> using suicide plasmids transformed into the *H. baltica* host strains by electroporation<sup>41</sup>  
479 followed by sacB sucrose selection. Briefly, genomic DNA was used as the template to PCR-  
480 amplify 500 bp fragments immediately upstream and downstream of the gene to be deleted. The  
481 primers used for amplification were designed with 25 bp overlapping segments for isothermal  
482 assembly<sup>42</sup> using the New England Biolabs NEBuilder tools for ligation into plasmid pNPTS139,  
483 which was digested using EcoRV-HF endonuclease from New England Biolabs. pNPTS139-  
484 based constructs were transformed into  $\alpha$ -select *E. coli* for screening and sequence confirmation  
485 before introduction into the host *C. crescentus* or *H. baltica* strains by electroporation. Introduction  
486 of the desired mutation onto the *C. crescentus* or *H. baltica* genome was verified by sequencing.

487 For gene complementation, the pMR10 plasmid was cut with EcoRV-HF and 500 bp  
488 upstream of the gene of interest containing the promoter, as well as the gene itself, were designed  
489 using New England Biolabs NEBuilder tools and fragments were amplified and ligated into  
490 plasmid pMR10 as described above. The pMR10-based constructs were transformed into  $\alpha$ -  
491 select *E. coli* for screening and sequence confirmation before introduction into the host *C.*  
492 *crenscentus* or *H. baltica* strains by electroporation.

493

#### 494 **Holdfast labeling using fluorescent lectins**

495 Holdfast labeling with AF488 conjugated lectins (Molecular Probes) was performed as  
496 previously described<sup>25</sup> with the following modifications. Overnight cultures were diluted in fresh  
497 medium to an OD<sub>600</sub> of 0.2 and incubated for 4 h to an OD<sub>600</sub> of 0.6 – 0.8. AF488 conjugated  
498 lectins were added to 100  $\mu$ l of the exponential culture to a final concentration of 0.5  $\mu$ g/ml and  
499 incubated at room temperature for 5 min. 5  $\mu$ l of the labeled culture was spotted onto a glass  
500 cover slide, overlaid with a 1.5 % (w/v) agarose (Sigma-Aldrich) pad in water, and visualized by  
501 epifluorescence microscopy. Imaging was performed using an inverted Nikon Ti-E microscope  
502 with a Plan Apo 60X objective, a GFP/DsRed filter cube, an Andor iXon3 DU885 EM CCD camera,  
503 and Nikon NIS Elements imaging software with 200 ms exposure time. Images were processed  
504 in ImageJ.<sup>43</sup>

505

#### 506 **Short-term adherence and biofilm assays**

507 This assay was performed as previously described<sup>25</sup> with the following modifications. For  
508 short-term binding assays, exponential cultures (OD<sub>600</sub> of 0.6 - 0.8) were diluted to an OD<sub>600</sub> of 0.4  
509 in fresh marine broth, added to 24-well plates (1 ml per well), and incubated with shaking (100  
510 rpm) at room temperature for 4 h. For biofilm assays, overnight cultures were diluted to an OD<sub>600</sub>  
511 of 0.1, added to a 24-well plate (1 ml per well), and incubated at room temperature for 12 hours

512 with shaking (100 rpm). In both set-ups,  $OD_{600}$  was measured before the wells were rinsed with  
513 distilled  $H_2O$  to remove non-adherent bacteria, stained using 0.1% crystal violet (CV), and rinsed  
514 again with  $dH_2O$  to remove excess CV. The CV was dissolved with 10% (v/v) acetic acid and  
515 quantified by measuring the absorbance at 600 nm ( $A_{600}$ ). Biofilm formation was normalized to  
516  $A_{600} / OD_{600}$  and expressed as a percentage of WT.

517

### 518 **HfsH expression using a copper inducible promoter**

519 Strains bearing copper inducible plasmids were inoculated from freshly grown colonies  
520 into 5 ml marine broth containing 5  $\mu\text{g/ml}$  kanamycin and incubated with shaking (200 rpm) at  
521 30°C overnight. Overnight cultures were diluted in fresh marine broth to  $OD_{600}$  of 0.1 and  
522 incubated until an  $OD_{600}$  of 0.4 was reached, where copper sulfate dissolved in marine broth was  
523 added to a final concentration of 0-250  $\mu\text{M}$ . For holdfast labeling, AF488 conjugated lectins were  
524 added to 100  $\mu\text{l}$  of exponential culture to a final concentration of 0.5  $\mu\text{g/ml}$  and incubated at room  
525 temperature for 5 min. 5  $\mu\text{l}$  of the labeled culture was spotted on glass cover slide, overlaid with  
526 a 1.5 % (w/v) agarose (Sigma-Aldrich) pad in water, and visualized by epifluorescence  
527 microscopy. Imaging was performed using an inverted Nikon Ti-E microscope with a Plan Apo  
528 60X objective, a GFP/DsRed filter cube, an Andor iXon3 DU885 EM CCD camera and Nikon NIS  
529 Elements imaging software with 200 ms exposure time. Images were processed in ImageJ.<sup>43</sup>

530 For short term binding and biofilm assays, the induced cultures and controls ( $OD_{600} = 0.4$ )  
531 were incubated with shaking (100 rpm) at room temperature for 4 - 12 h. Then,  $OD_{600}$  was  
532 measured before the wells were rinsed with distilled  $H_2O$  to remove non-adherent bacteria,  
533 stained using 0.1% crystal violet (CV), and rinsed again with  $dH_2O$  to remove excess CV. The CV  
534 was dissolved with 10% (v/v) acetic acid and quantified by measuring the absorbance at 600 nm  
535 ( $A_{600}$ ). Biofilm formation was normalized to  $A_{600} / OD_{600}$  and expressed as a percentage of WT.

536

### 537 **Visualization of holdfasts attached on a glass surface**

538 Visualization of holdfast binding to glass surfaces was performed as described  
539 previously<sup>25</sup> with the following modifications. *H. baltica* and *C. crescentus* strains grown to  
540 exponential phase ( $OD_{600} = 0.4 - 0.6$ ) were incubated on washed glass coverslips at room  
541 temperature in a saturated humidity chamber for 4 - 8 h. After incubation, the slides were rinsed  
542 with  $dH_2O$  to remove unbound cells, holdfasts were labelled using 50  $\mu l$  of fluorescent AF488/594  
543 conjugated lectins at a concentration of 0.5  $\mu g/ml$ , and cover slides were incubated at room  
544 temperature for 5 min. Then, excess lectin was washed off and the cover slide was topped with a  
545 glass coverslip. Holdfasts were imaged by epifluorescence microscopy using an inverted Nikon  
546 Ti-E microscope with a Plan Apo 60X objective, a GFP/DsRed filter cube, an Andor iXon3 DU885  
547 EM CCD camera and Nikon NIS Elements imaging software with 200 ms exposure time. Images  
548 were processed in ImageJ.<sup>43</sup>

549

### 550 **Holdfast synthesis by time-lapse microscopy on soft agarose pads**

551 *H. baltica* holdfast synthesis was observed in live cells on agarose pads by time-lapse  
552 microscopy as described previously<sup>25</sup> with some modifications. A 1  $\mu l$  aliquot of exponential-phase  
553 cells ( $OD_{600}$  of 0.4 – 0.8) induced with 0 – 250  $\mu M$   $CuSO_4$  was placed on top of a 0.8% agarose  
554 pad in marine broth with 0.5  $\mu g/ml$  of AF488-WGA. The pad was overlaid with a coverslip and  
555 sealed with VALAP (Vaseline, lanolin and paraffin wax). Time-lapse microscopy images were  
556 taken every 5 min for 12 h using an inverted Nikon Ti-E microscope and a Plan Apo 60X objective,  
557 a GFP/DsRed filter cube, and an Andor iXon3 DU885 EM CCD camera. Time-lapse movies were  
558 processed using ImageJ.<sup>43</sup>

559

### 560 **Holdfast synthesis in a microfluidic device by time-lapse microscopy**

561 This experiment was performed as previously described<sup>25</sup> with the following modifications.  
562 Cell cultures were grown to mid-exponential phase ( $OD_{600} = 0.4-0.6$ ) and induced with 0 – 250



563  $\mu\text{M}$   $\text{CuSO}_4$ . Then, 200  $\mu\text{l}$  of culture was diluted into 800  $\mu\text{l}$  of fresh marine broth with 0 – 250  $\mu\text{M}$   
564  $\text{CuSO}_4$  in the presence of 0.5  $\mu\text{g/ml}$  AF488-WGA for holdfast labeling. One ml of the cell culture  
565 was then flushed into a microfluidic device containing a 10  $\mu\text{m}$  high linear chamber fabricated in  
566 PDMS (Polydimethylsiloxane) as described previously.<sup>44</sup> After injection of the cells into the  
567 microfluidic chamber, the flow rate was adjusted so that attachment could be observed under  
568 static conditions or low flow rate of 1.4  $\mu\text{l/min}$ .

569 Time-lapse microscopy was performed using an inverted Nikon Ti-E microscope and a  
570 Plan Apo 60X objective, a GFP/DsRed filter cube, an Andor iXon3 DU885 EM CCD camera, and  
571 Nikon NIS Elements imaging software. Time-lapse videos were collected over a period of 5.5 h  
572 at 20-second intervals. Cell attachment was detected at the glass-liquid interface within the  
573 microfluidic chamber using phase contrast microscopy, while holdfast synthesis was detected  
574 using fluorescence microscopy. Time-lapse movies were processed using ImageJ.<sup>43</sup>

575

#### 576 **Holdfast labeling using fluorescently labeled maleimide and lectin**

577 Alexa Flour conjugated Maleimide C<sub>5</sub> (AF488-mal, ThermoFisher Scientific) and AF594-  
578 WGA (Molecular Probes) were both added to 100  $\mu\text{l}$  of exponential culture to a final concentration  
579 of 0.5  $\mu\text{g/ml}$  and incubated at room temperature for 5 min. 5  $\mu\text{l}$  of the labeled culture was spotted  
580 onto a glass cover slide, overlaid with a 1.5 % (w/v) agarose (Sigma-Aldrich) pad in water, and  
581 visualized by epifluorescence microscopy. Imaging was performed using an inverted Nikon Ti-E  
582 microscope with a Plan Apo 60X objective, a GFP/DsRed filter cube, an Andor iXon3 DU885 EM  
583 CCD camera, and Nikon NIS Elements imaging software with 200 ms exposure time. Images  
584 were processed in ImageJ.<sup>43</sup>

585

#### 586 **Effect of ionic strength on holdfast binding**

587 Visualization of attachment of purified holdfasts to surfaces at different ionic strengths was  
588 performed as described previously<sup>25</sup> with the following modifications. Briefly, exponential cultures

589 of strains carrying *hfsH* under the control of the copper inducible promoter ( $P_{Cu}$ ), xylose inducible  
590 promoters ( $P_{xy}$ ), or controls ( $P_{hfs}$ ) were grown to late exponential phase ( $OD_{600} = 0.6 - 0.8$ ) in  
591 PYE with 1.5% (w/v) NaCl for *H. baltica* strains, or PYE with no NaCl for *C. crescentus* strains  
592 with 0 – 250  $\mu$ M  $CuSO_4$  or 0.03% xylose. The cells were collected by centrifugation for 30 min at  
593 4,000 x  $g$  and resuspended in PYE with 0 – 250  $\mu$ M  $CuSO_4$  or 0.03% xylose and incubated for 2  
594 h at 30 °C. Then, the cells were again collected by centrifugation as above and 100  $\mu$ l of the  
595 resultant supernatant, containing holdfasts shed by the cells, were mixed with 100  $\mu$ l of NaCl in  
596 PYE to a final concentration of 0 - 1000 mM of NaCl. 50  $\mu$ l of the mixture was incubated on washed  
597 glass coverslips at room temperature in a saturated humidity chamber for 4 - 12 h. After  
598 incubation, the slides were rinsed with  $dH_2O$  to remove unbound material and holdfast were  
599 visualized with AF conjugated lectins (Molecular Probes). Imaging was performed using an  
600 inverted Nikon Ti-E microscope with a Plan Apo 60X objective, a GFP/DsRed filter cube, an Andor  
601 iXon3 DU885 EM CCD camera, and Nikon NIS Elements imaging software with 200 ms exposure  
602 time. Images were processed in ImageJ.<sup>43</sup> The number of holdfasts bound per field of view was  
603 quantified using MicrobeJ.<sup>45</sup>

604

## 605 **Western blot analysis**

606 Cell lysates were prepared from exponentially growing cultures ( $OD_{600} = 0.6-0.8$ ) as  
607 previously described<sup>27</sup> with the following modifications. The equivalent of 1.0 ml of culture at an  
608  $OD_{600}$  of 0.6-0.8 was centrifuged at 16 000 x  $g$  for 5 min at 4 °C. The supernatant was removed,  
609 and cell pellets were resuspended in 50  $\mu$ l of 10mM Tris pH 8.0, followed by the addition of 50  $\mu$ l  
610 of 2x SDS sample buffer. Samples were boiled for 5 min at 100 °C before being run on a 12%  
611 (w/v) polyacrylamide gel and transferred to a nitrocellulose membrane. Membranes were blocked  
612 for 30 min in 5% (w/v) non-fat dry milk in TBST (20 mM Tris, pH 8, 0.05% (w/v) Tween 20), and  
613 incubated at 4 °C overnight with primary antibodies. Anti-FLAG tag and McpA antibodies were

614 used at a concentration of 1:10 000. Then, a 1:10 000 dilution of secondary antibody, HRP-  
615 conjugated goat anti-rabbit immunoglobulin, was incubated with the membranes at room  
616 temperature for 2 h. Membranes were developed with SuperSignal West Dura Substrate (Thermo  
617 Scientific, Rockford, IL).

618

## 619 **ACKNOWLEDGEMENTS**

620 We thank the members of the Brun laboratory for the discussion and providing critical comments  
621 on the manuscript. This study was supported by grant R35GM122556 from the National Institutes  
622 of Health to YVB. YVB is supported by a Canada 150 Research Chair in Bacterial Cell Biology  
623 from the Canadian Institutes of Health Research.

624

## 625 **AUTHOR CONTRIBUTION**

626 YVB and NKC designed the research. NKC performed the research. YVB and NKC  
627 analyzed the data. YVB and NKC wrote the paper.

628

## 629 **REFERENCES**

- 630 1. Maier GP, Rapp MV, Waite JH, Israelachvili JN, Butler A. (2015). Adaptive synergy  
631 between catechol and lysine promotes wet adhesion by surface salt displacement.  
632 *Science* 349(6248):628-32.
- 633 2. Waite JH. (2017). Mussel adhesion—essential footwork. *Journal of Experimental*  
634 *Biology* 220(4):517-30.
- 635 3. Lee BP, Messersmith PB, Israelachvili JN, Waite JH. (2011). Mussel-inspired  
636 adhesives and coatings. *Annual review of materials research* 41:99-132.
- 637 4. Li S, Xia Z, Chen Y, Gao Y, Zhan A. (2018). Byssus structure and protein  
638 composition in the highly invasive fouling mussel *Limnoperna fortunei*. *Frontiers in*  
639 *Physiology* 9:418.
- 640 5. Anderson KE, Waite JH. (2002). Biochemical characterization of a byssal protein  
641 from *Dreissena bugensis* (Andrusov). *Biofouling* 18(1):37-45.
- 642 6. Bandara N, Zeng H, Wu J. (2013). Marine mussel adhesion: biochemistry,  
643 mechanisms, and biomimetics. *Journal of adhesion science and technology* 27(18-  
644 19):2139-62.

- 645 7. Rzepecki L, Waite J. (1993). The byssus of the zebra mussel, *Dreissena*  
646 *polymorpha*. II: Structure and polymorphism of byssal polyphenolic protein  
647 families. *Molecular marine biology and biotechnology* 2(5):267-79.
- 648 8. Sone ED. Interfacial phenomena in marine and freshwater mussel adhesion.  
649 *Biological adhesives*: Springer; 2016. p. 129-51.
- 650 9. Berne C, Ducret A, Hardy GG, Brun YV. (2015). Adhesins involved in attachment  
651 to abiotic surfaces by Gram-negative bacteria. *Microbiology spectrum* 3(4).
- 652 10. Berne C, Ellison CK, Ducret A, Brun YV. (2018). Bacterial adhesion at the single-  
653 cell level. *Nat Rev Microbiol* 16(10):616-27.
- 654 11. Chen Y, Busscher HJ, van der Mei HC, Norde W. (2011). Statistical analysis of  
655 long-and short-range forces involved in bacterial adhesion to substratum surfaces  
656 as measured using atomic force microscopy. *Appl Environ Microbiol* 77(15):5065-  
657 70.
- 658 12. Tuson HH, Weibel DB. (2013). Bacteria–surface interactions. *Soft matter*  
659 9(17):4368-80.
- 660 13. Ruffatto III D, Parness A, Spenko M. (2014). Improving controllable adhesion on  
661 both rough and smooth surfaces with a hybrid electrostatic/gecko-like adhesive.  
662 *Journal of The Royal Society Interface* 11(93):20131089.
- 663 14. Garrels R, Thompson M. (1962). A chemical model for sea water at 25 degrees C  
664 and one atmosphere total pressure. *American Journal of Science* 260(1):57-66.
- 665 15. Zita A, Hermansson M. (1994). Effects of ionic strength on bacterial adhesion and  
666 stability of flocs in a wastewater activated sludge system. *Appl Environ Microbiol*  
667 60(9):3041-8.
- 668 16. Chen G, Walker SL. (2007). Role of solution chemistry and ion valence on the  
669 adhesion kinetics of groundwater and marine bacteria. *Langmuir* 23(13):7162-9.
- 670 17. de Carvalho CCCR. (2018). Marine Biofilms: A Successful Microbial Strategy With  
671 Economic Implications. *Frontiers in Marine Science* 5(126).
- 672 18. Wilhelm RC. (2018). Following the terrestrial tracks of *Caulobacter*-redefining the  
673 ecology of a reputed aquatic oligotroph. *ISME J* 12:3025-37.
- 674 19. Poindexter JS. (1964). Biological properties and classification of the *Caulobacter*  
675 group. *Bacteriological reviews* 28(3):231.
- 676 20. Merker RI, Smit J. (1988). Characterization of the adhesive holdfast of marine and  
677 freshwater *caulobacters*. *Appl Environ Microbiol* 54(8):2078-85.
- 678 21. Hershey DM, Porfírio S, Black I, Jaehrig B, Heiss C, Azadi P, et al. (2019).  
679 Composition of the holdfast polysaccharide from *Caulobacter crescentus*. *Journal*  
680 *of bacteriology*:JB. 00276-19.
- 681 22. Hernando-Pérez M, Setayeshgar S, Hou Y, Temam R, Brun YV, Dragnea B, et al.  
682 (2018). Layered structure and complex mechanochemistry underlie strength and  
683 versatility in a bacterial adhesive. *mBio* 9(1):e02359-17.
- 684 23. Berne Cc, Ma X, Licata NA, Neves BR, Setayeshgar S, Brun YV, et al. (2013).  
685 Physiochemical properties of *Caulobacter crescentus* holdfast: a localized  
686 bacterial adhesive. *The Journal of Physical Chemistry B* 117(36):10492-503.
- 687 24. Tsang PH, Li G, Brun YV, Freund LB, Tang JX. (2006). Adhesion of single bacterial  
688 cells in the micronewton range. *Proceedings of the National Academy of Sciences*  
689 103(15):5764-8.

- 690 25. Chepkwony NK, Berne C, Brun YV. (2019). Comparative analysis of ionic strength  
691 tolerance between freshwater and marine Caulobacterales adhesins. *Journal of*  
692 *bacteriology*:JB. 00061-19.
- 693 26. Sprecher KS, Hug I, Nesper J, Potthoff E, Mahi M-A, Sangermani M, et al. (2017).  
694 Cohesive properties of the *Caulobacter crescentus* holdfast adhesin are regulated  
695 by a novel c-di-GMP effector protein. *MBio* 8(2):e00294-17.
- 696 27. Wan Z, Brown PJ, Elliott EN, Brun YV. (2013). The adhesive and cohesive  
697 properties of a bacterial polysaccharide adhesin are modulated by a deacetylase.  
698 *Molecular microbiology* 88(3):486-500.
- 699 28. Cole JL, Hardy GG, Bodenmiller D, Toh E, Hinz A, Brun YV. (2003). The HfaB and  
700 HfaD adhesion proteins of *Caulobacter crescentus* are localized in the stalk.  
701 *Molecular microbiology* 49(6):1671-83.
- 702 29. Hardy GG, Allen RC, Toh E, Long M, Brown PJ, Cole-Tobian JL, et al. (2010). A  
703 localized multimeric anchor attaches the *Caulobacter* holdfast to the cell pole.  
704 *Molecular microbiology* 76(2):409-27.
- 705 30. Sorlier P, Denuzière A, Viton C, Domard A. (2001). Relation between the degree  
706 of acetylation and the electrostatic properties of chitin and chitosan.  
707 *Biomacromolecules* 2(3):765-72.
- 708 31. Ong CJ, Wong M, Smit J. (1990). Attachment of the adhesive holdfast organelle  
709 to the cellular stalk of *Caulobacter crescentus*. *Journal of bacteriology*  
710 172(3):1448-56.
- 711 32. Tuveng TR, Rothweiler U, Udatha G, Vaaje-Kolstad G, Smalås A, Eijsink VG.  
712 (2017). Structure and function of a CE4 deacetylase isolated from a marine  
713 environment. *PloS one* 12(11):e0187544.
- 714 33. Berne C, Kysela DT, Brun YV. (2010). A bacterial extracellular DNA inhibits settling  
715 of motile progeny cells within a biofilm. *Molecular microbiology* 77(4):815-29.
- 716 34. Abu-Lail N, Camesano T. (2003). Polysaccharide properties probed with atomic  
717 force microscopy. *Journal of Microscopy* 212(3):217-38.
- 718 35. Donlan RM. (2002). Biofilms: microbial life on surfaces. *Emerging infectious*  
719 *diseases* 8(9):881.
- 720 36. Dunne WM. (2002). Bacterial adhesion: seen any good biofilms lately? *Clinical*  
721 *microbiology reviews* 15(2):155-66.
- 722 37. Pawar PM-A, Koutaniemi S, Tenkanen M, Mellerowicz EJ. (2013). Acetylation of  
723 woody lignocellulose: significance and regulation. *Frontiers in plant science* 4:118.
- 724 38. Abu-Lail NI, Camesano TA. (2003). Role of Ionic Strength on the Relationship of  
725 Biopolymer Conformation, DLVO Contributions, and Steric Interactions to  
726 Boadhesion of *Pseudomonas putida* KT2442. *Biomacromolecules* 4(4):1000-12.
- 727 39. Shephard JJ, Savory DM, Bremer PJ, McQuillan AJ. (2010). Salt modulates  
728 bacterial hydrophobicity and charge properties influencing adhesion of  
729 *Pseudomonas aeruginosa* (PA01) in aqueous suspensions. *Langmuir*  
730 26(11):8659-65.
- 731 40. Ried JL, Collmer A. (1987). An nptI-sacB-sacR cartridge for constructing directed,  
732 unmarked mutations in gram-negative bacteria by marker exchange-*eviction*  
733 *mutagenesis*. *Gene* 57(2-3):239-46.
- 734 41. Ely B. [17] *Genetics of Caulobacter crescentus*. *Methods in enzymology*. 204:  
735 Elsevier; 1991. p. 372-84.

- 736 42. Gibson DG, Young L, Chuang R-Y, Venter JC, Hutchison III CA, Smith HO. (2009).  
737 Enzymatic assembly of DNA molecules up to several hundred kilobases. *Nature*  
738 *methods* 6(5):343.
- 739 43. Schneider CA, Rasband WS, Eliceiri KW. (2012). NIH Image to ImageJ: 25 years  
740 of image analysis. *Nature methods* 9(7):671.
- 741 44. Hoffman MD, Zucker LI, Brown PJ, Kysela DT, Brun YV, Jacobson SC. (2015).  
742 Timescales and frequencies of reversible and irreversible adhesion events of  
743 single bacterial cells. *Analytical chemistry* 87(24):12032-9.
- 744 45. Ducret A, Quardokus EM, Brun YV. (2016). MicrobeJ, a tool for high throughput  
745 bacterial cell detection and quantitative analysis. *Nature microbiology* 1(7):16077.  
746

# Figure 1: Cell cycle and holdfast synthesis of *C. crescentus* and *H. baltica*

## A *C. crescentus* cell cycle and holdfast synthesis

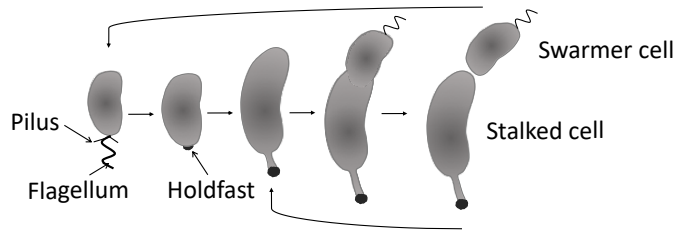

## B *H. baltica* cell cycle and holdfast synthesis

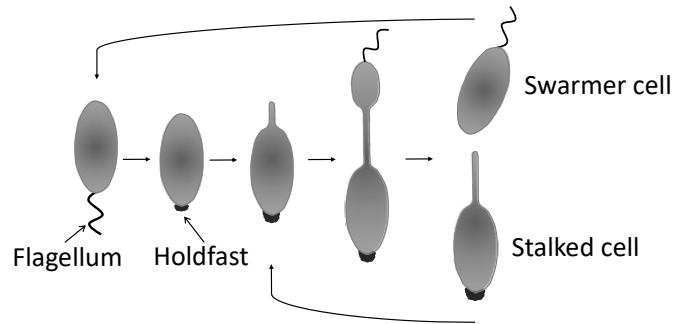

1 **FIGURE LEGENDS**

2 **Figure 1: Cell cycle and holdfast synthesis of *C. crescentus* and *H. baltica***

3 **A.** Diagram of the *C. crescentus* dimorphic cell cycle. A motile swarmer cell differentiates into a  
4 stalked cell by shedding the flagellum, retracting the pili, and synthesizing a holdfast-tipped stalk  
5 at the same cell pole. *C. crescentus* stalked cells divide asymmetrically to produce a motile  
6 swarmer cell and a surface-adherent stalked cell. **B.** Diagram of the *H. baltica* dimorphic cell  
7 cycle. A motile swarmer cell differentiates into a stalked cell by shedding its flagellum and  
8 synthesizing holdfast at the same cell pole. At the opposite pole, a budding stalk is synthesized  
9 that is used to bud a new motile swarmer cell.

10



**Figure 2: The role of HfsH and HfsK in *H. baltica* holdfast biogenesis**

**A Holdfast genes**

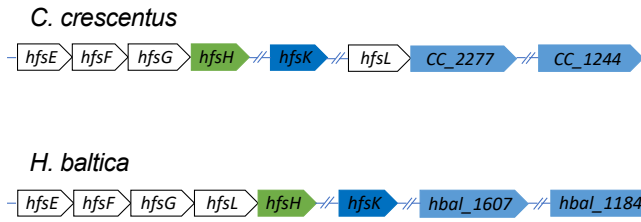

**B *H. baltica* strains biofilm**

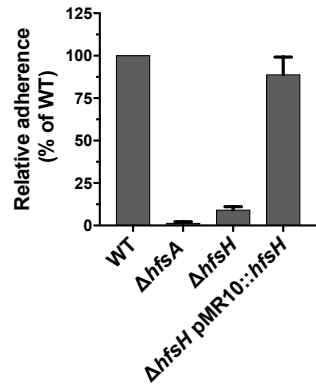

**C Predivisional cells with holdfasts on agarose pads (% wild-type)**

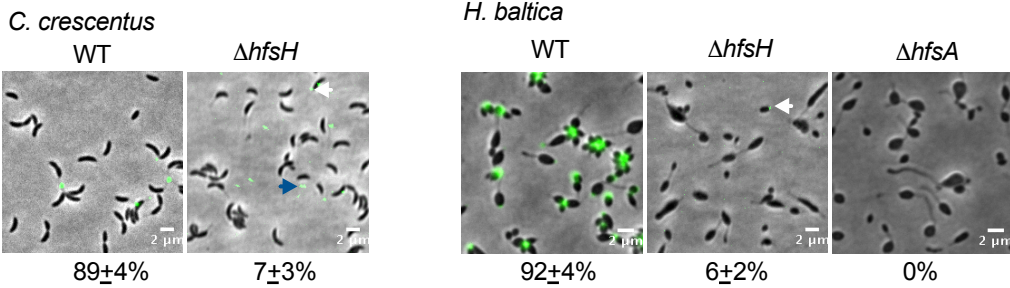

**D Cells attached to glass coverslips after washing (% wild-type)**

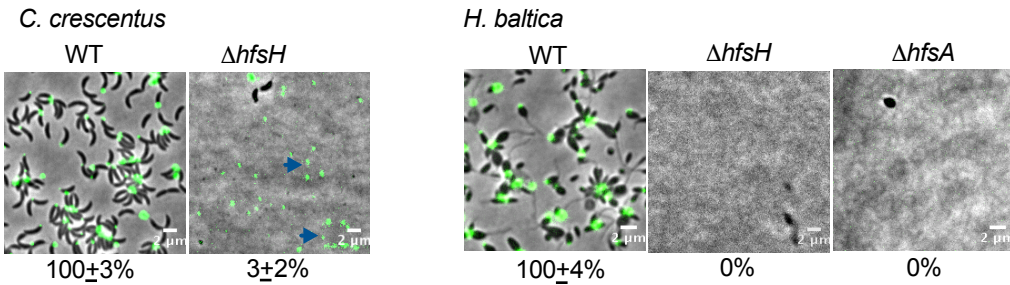

**E *H. baltica***

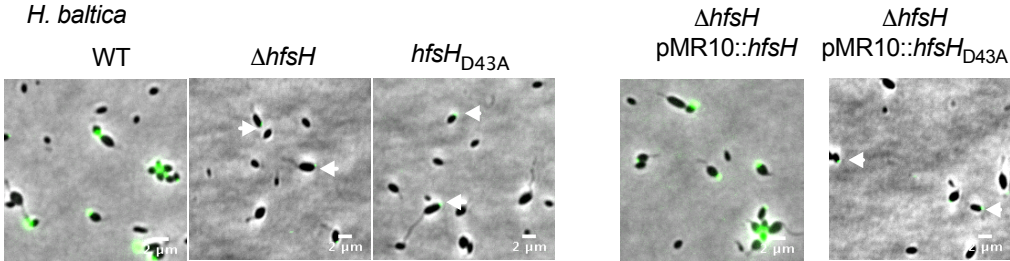

11 **Figure 2: The role of HfsH and HfsK in *H. baltica* holdfast biogenesis**

12 **A.** Genomic organization of holdfast synthesis (*hfs*) genes in *C. crescentus* and *H. baltica*. Genes  
13 were identified using reciprocal best hit analysis on *C. crescentus* and *H. baltica* genomes. In both  
14 *C. crescentus* and *H. baltica* genomes, *hfsH* is found in the *hfs* locus while *hfsK* and its paralogs  
15 are found outside the *hfs* locus. Color coding corresponds to homologs and paralogs. Hash marks  
16 indicate genes that are found in a different location in the genome. **B.** Quantification of biofilm  
17 formation by the crystal violet assay after incubation for 12 h, expressed as a mean percent of  
18 WT crystal violet staining. Holdfast null strain  $\Delta hfsA$  was used as a negative control. Error is  
19 expressed as the standard error of the mean of three independent biological replicates with four  
20 technical replicates each. **C.** Representative images showing merged phase and fluorescence  
21 channels of the indicated *C. crescentus* and *H. baltica* strains on agarose pads. Holdfast is labeled  
22 with AF488-WGA (green). White arrows indicate holdfasts attached to the  $\Delta hfsH$  cells, and blue  
23 arrows indicate holdfast shed into the medium. Exponential planktonic cultures were used to  
24 quantify the percentage of predivisional cells with holdfast. Data are expressed as the mean of  
25 three independent biological replicates with four technical replicates each. Error bars represent  
26 the standard error of the mean. A total of 3,000 cells were quantified per replicate using MicrobeJ.  
27 **D.** Representative images showing merged phase and fluorescence channels of *C. crescentus*  
28 and *H. baltica* strains bound to a glass coverslip. Exponential cultures were incubated on the  
29 glass slides for 1 h, washed to remove unbound cells, and holdfast were labelled with AF488-  
30 WGA (green). Blue arrows indicate surface-bound holdfasts shed by *hfsH* mutants. The data  
31 showing quantification of cells bound to the glass coverslip are the mean of two biological  
32 replicates with five technical replicates each. Error is expressed as the standard error of the mean  
33 using MicrobeJ. **E.** Representative images showing merged phase and fluorescence channels of  
34 *H. baltica* strains with holdfast polysaccharides labeled with AF488-WGA (green) on agarose  
35 pads. A point mutation was introduced at a key substrate binding residue in *H. baltica* HfsH,

36 resulting in an amino acid change from aspartic acid to alanine at position 43 (D43A). White

37 arrows indicate faint AF488-WGA holdfast labeling on mutant cells

38

**Figure 3: *H. baltica* hfsH mutant holdfasts forms thread-like fibers that diffuse into the medium**

**A Time-lapse on soft agarose pads**

*H. baltica* WT

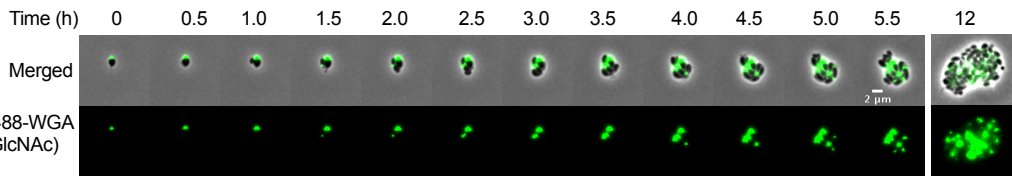

*H. baltica*  $\Delta$ hfsH

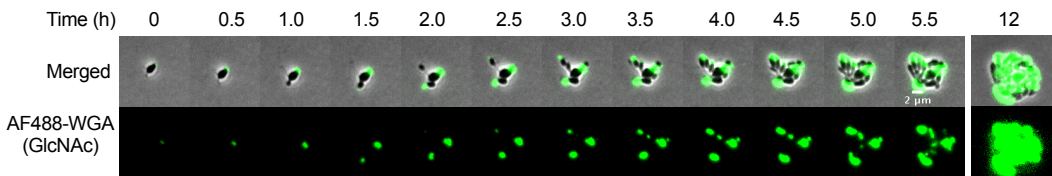

**B Time-lapse on glass coverslip surface**

*H. baltica* WT

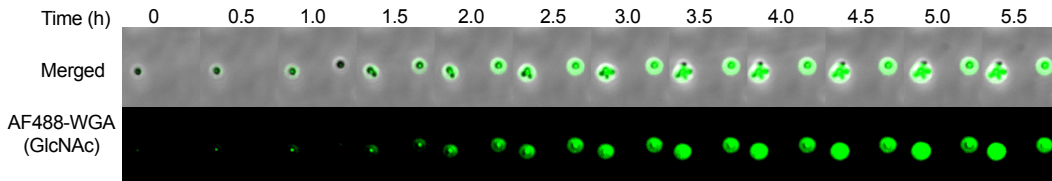

*H. baltica*  $\Delta$ hfsH

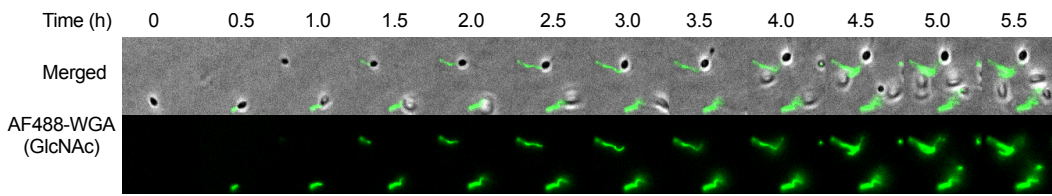

39 **Figure 3: *H. baltica* *hfsH* mutant holdfasts forms thread-like fibers that diffuse into the**  
40 **medium**

41 **A.** Time-lapse montages of *H. baltica* WT and *H. baltica*  $\Delta hfsH$  on soft agarose pads. Exponential  
42 cultures were placed on soft agarose pads containing holdfast-specific AF488-WGA (green) and  
43 covered with a glass coverslip. Images were collected every 5 min for 12 h. **B.** Time-lapse  
44 montages of *H. baltica* WT and *H. baltica*  $\Delta hfsH$  in microfluidic channels. Exponential cultures  
45 with holdfast-specific AF488-WGA (green) were injected into the microfluidic chambers and flow  
46 was turned off. Images were collected every 20 sec for 5.5 h.

47

**Figure 4: HfsH expression correlates to the level of biofilm formation**

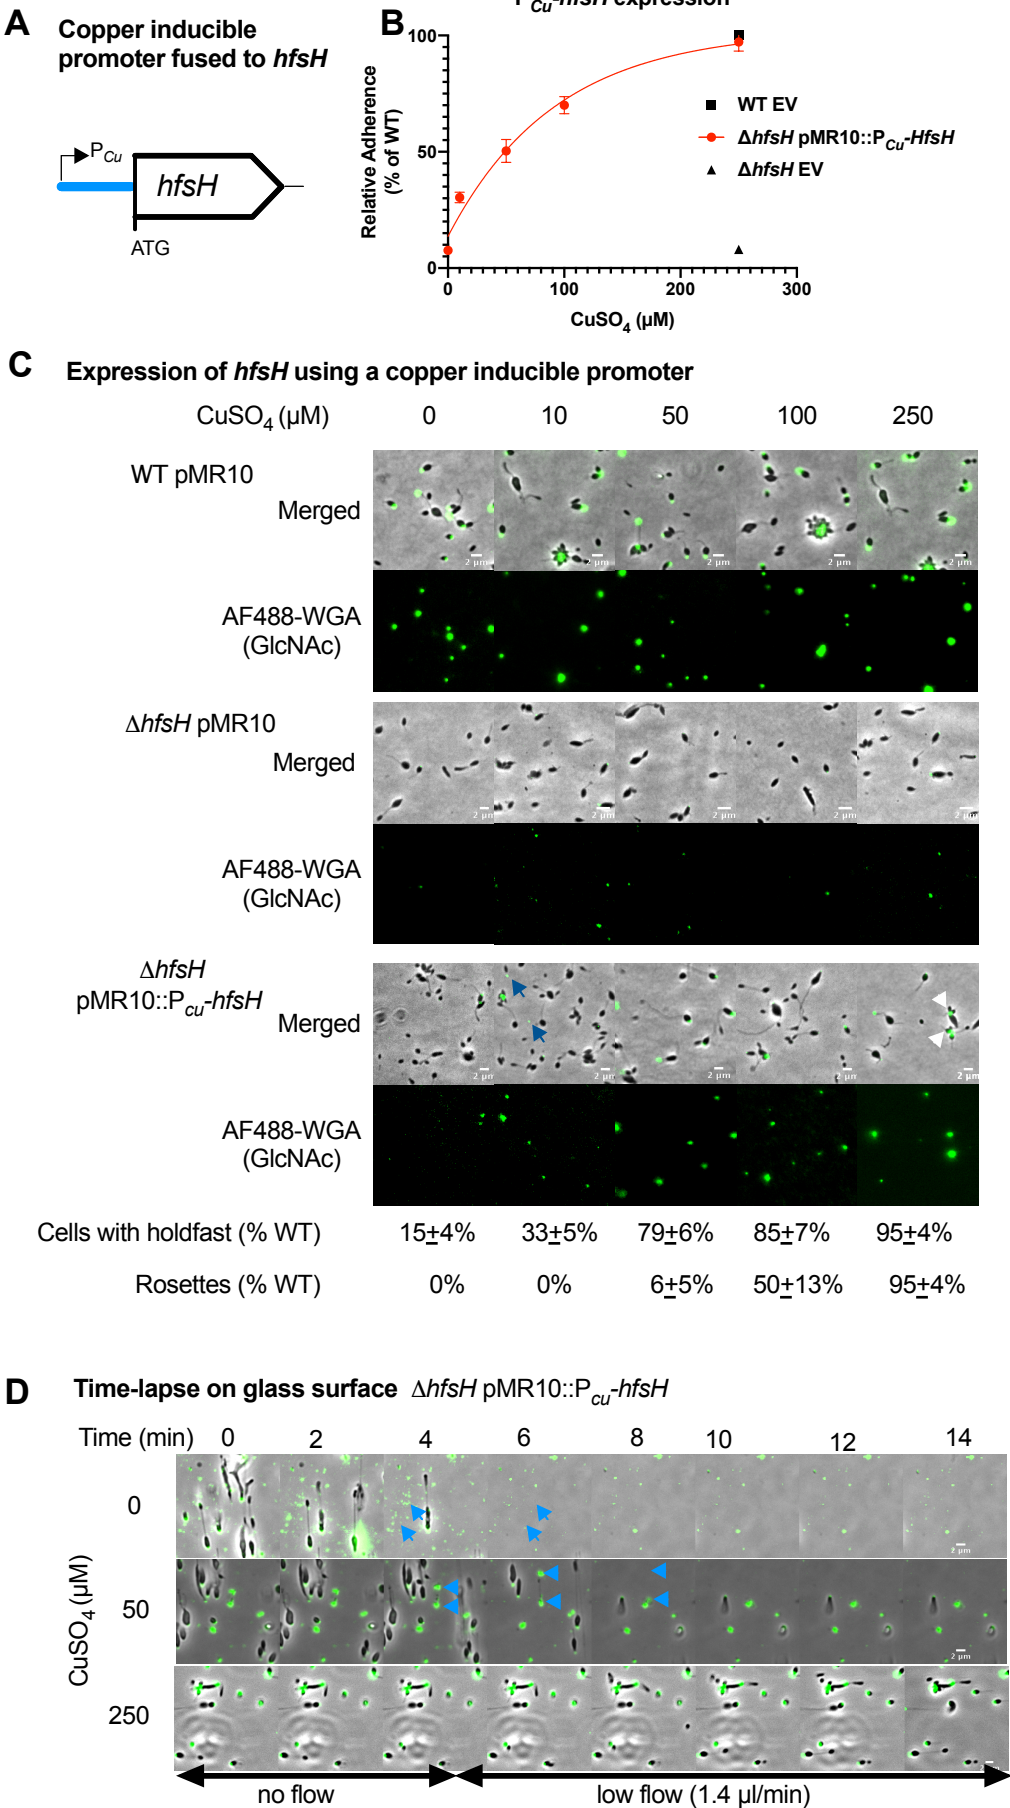

48 **Figure 4: HfsH expression correlates to the level of biofilm formation**

49 **A.** Schematic representation of *hfsH* under the control of a copper inducible promoter. 500 bp  
50 upstream of the *copA* open reading frame corresponding to the promoter region,  $P_{Cu}$ , were fused  
51 to *hfsH* from *H. baltica* and assembled into the plasmid pMR10. **B.** A logarithmic plot showing  
52 quantification of adhesion of *H. baltica* strains induced with 0 – 250  $\mu$ M of  $CuSO_4$  for 4 h by the  
53 crystal violet assay. Data is expressed as a mean percent of WT crystal violet staining from three  
54 independent biological replicates with four technical replicates. Error is expressed as the standard  
55 error of the mean. EV is empty vector (pMR10). **C.** Representative images of *H. baltica* WT, *H.*  
56 *baltica*  $\Delta hfsH$ , and *H. baltica*  $\Delta hfsH$  complemented with pMR10:: $P_{Cu}$ -*hfsH*. Holdfasts were labeled  
57 with AF488-WGA (green). Exponential cultures were induced for 2 h with 0 – 250  $\mu$ M of  $CuSO_4$ .  
58 Blue arrows indicate shed holdfast at low levels of induction (10  $\mu$ M  $CuSO_4$ ), and white  
59 arrowheads indicate rosettes formed at high levels of HfsH induction (250  $\mu$ M  $CuSO_4$ ). **D.** Time-  
60 lapse montages of *H. baltica*  $\Delta hfsH$  pMR10:: $P_{Cu}$ -*hfsH* in microfluidic channels with holdfast  
61 labeled with AF488-WGA (green). Exponential cultures were induced with 0  $\mu$ M, 50  $\mu$ M, or 250  
62  $\mu$ M  $CuSO_4$ , mixed with AF488-WGA, injected into the microfluidic chambers, and allowed to bind  
63 for 30 min. Thereafter, the flow rate was adjusted to 1.4  $\mu$ l/min. Images were collected every 20  
64 sec for 1 h. Blue arrows indicate shed holdfasts.

65

**Figure 5: Overexpression of HfsH increases biofilm formation in *C. crescentus* but not *H. baltica***

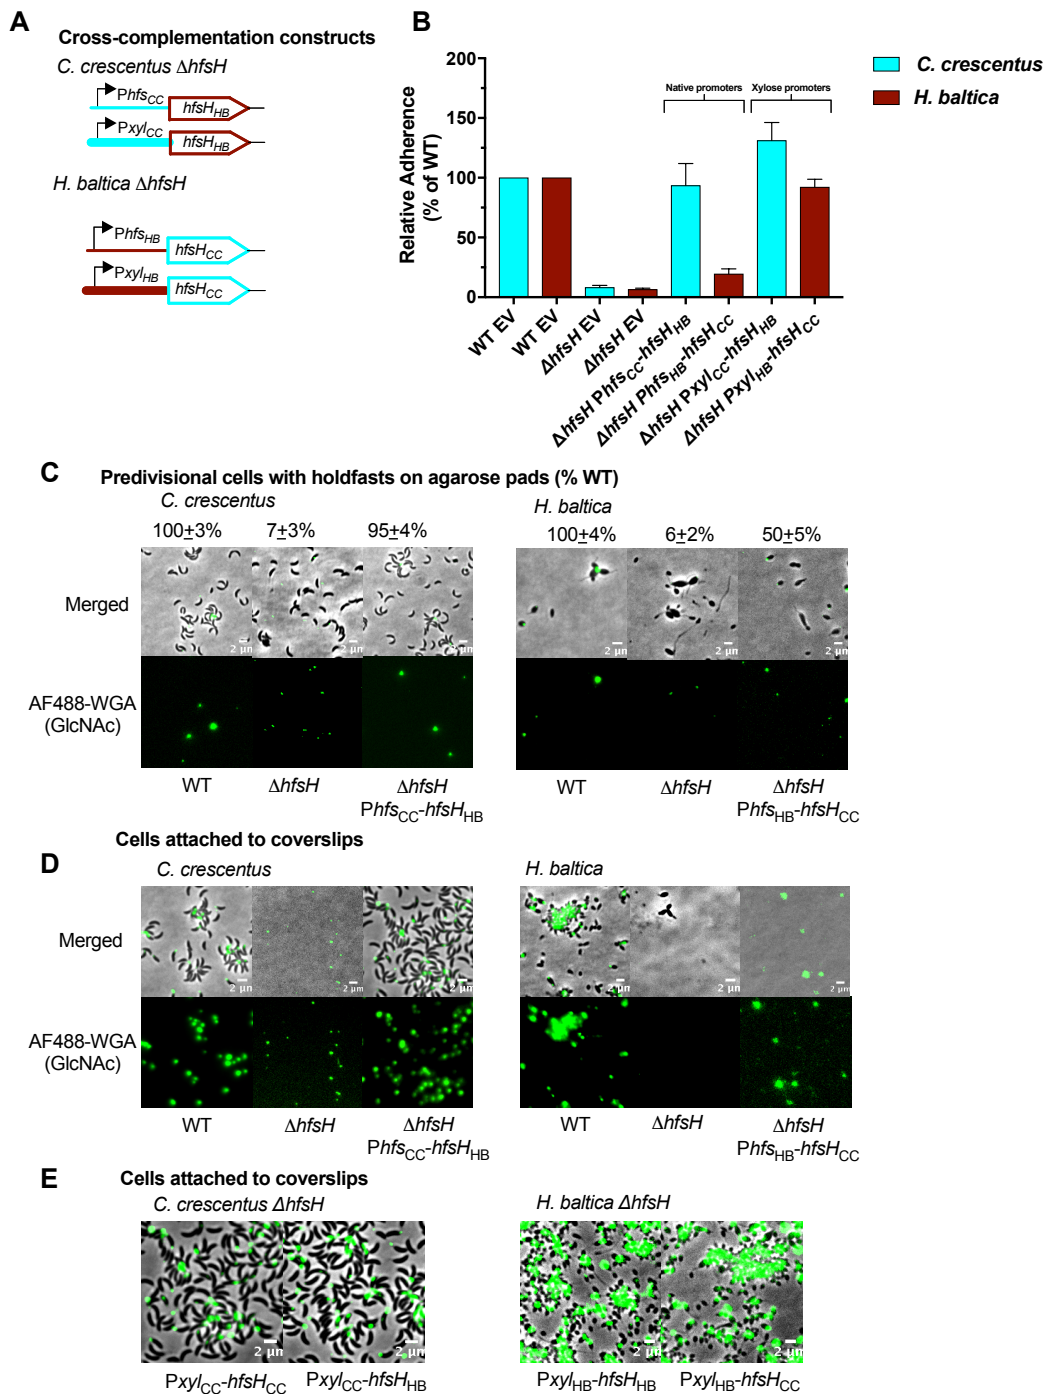



66 **Figure 5: Overexpression of HfsH increases biofilm formation in *C. crescentus* but not *H.***

67 ***baltica***

68 **A.** Schematic representations of cross-complementation constructs of the *hfsH* gene from *C.*  
69 *crescentus* (*hfsH<sub>CC</sub>*) and *H. baltica* (*hfsH<sub>HB</sub>*) under native holdfast synthesis (*Phfs*) or xylose  
70 inducible (*PxyI*) promoters. Native promoters were fused to foreign *hfsH* genes (*Phfs<sub>CC</sub>* and *PxyI<sub>CC</sub>*  
71 from *C. crescentus*, or *Phfs<sub>HB</sub>* and *PxyI<sub>HB</sub>* from *H. baltica*) and assembled into the pMR10 plasmid.

72 **B.** Quantification of short-term adhesion (12 h) by the crystal violet assay. Data is expressed as  
73 a mean percent of WT crystal violet staining from three biological replicates with four technical  
74 replicates each. Error is expressed as the standard error of the mean. **C.** Representative images

75 showing merged phase and fluorescence channels of *C. crescentus* and *H. baltica* strains.  
76 Holdfasts are labeled with AF488-WGA (green). *Phfs<sub>CC</sub>-hfsH<sub>HB</sub>*, *C. crescentus*  $\Delta$ *hfsH* cross-  
77 complemented with HfsH from *H. baltica* under the control of the *hfs* promoter; *Phfs<sub>HB</sub>-hfsH<sub>CC</sub>*, *H.*  
78 *baltica*  $\Delta$ *hfsH* cross-complemented with HfsH from *C. crescentus* under the control of the *hfs*

79 promoter. Exponential planktonic cultures were used to quantify the percentage of predivisional  
80 cells with holdfast. Data is expressed as the mean of three independent biological replicates with  
81 four technical replicates each. Error bars represent the standard error of the mean. **D.** Images

82 showing merged phase and fluorescence channels of *C. crescentus* and *H. baltica* strains bound  
83 to glass slides. Holdfast is labeled with AF488-WGA (green). Exponential cultures were incubated  
84 on the glass slides for 1 h, unbound cells were washed off, and AF488-WGA was added to label  
85 bound holdfast. **E.** Merged phase and fluorescence channels of *H. baltica*  $\Delta$ *hfsH* and *C.*

86 *crescentus*  $\Delta$ *hfsH* strains bound to glass slides. Holdfast is labeled with AF488-WGA (green).  
87 Exponential cultures were incubated on the glass slides for 1 h, unbound cells were washed off,  
88 and AF488-WGA was added to label bound holdfast. Strains carry native or cross-complemented  
89 HfsH under the control of the xylose inducible promoter for overexpression.

90

# Figure 6: Increased HfsH expression increases holdfast binding in high ionic strength environments

**A**

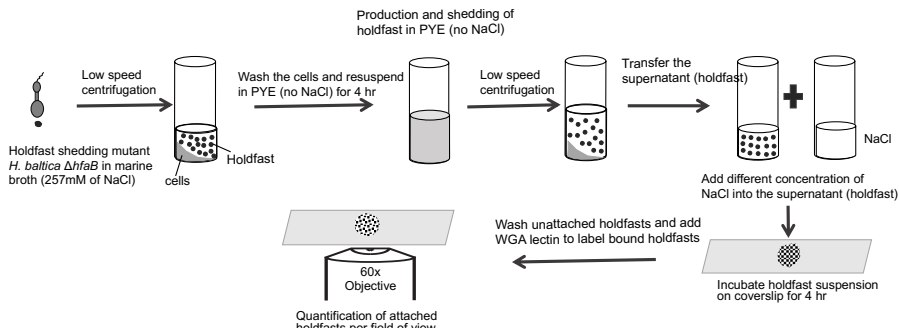

**B**

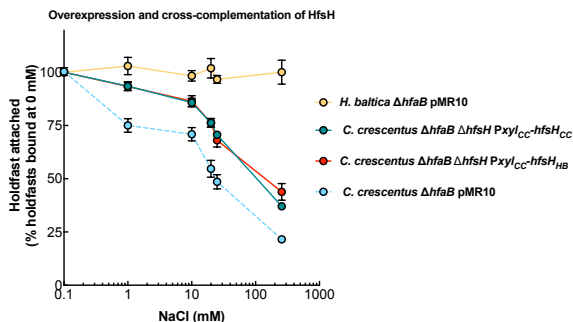

**C**

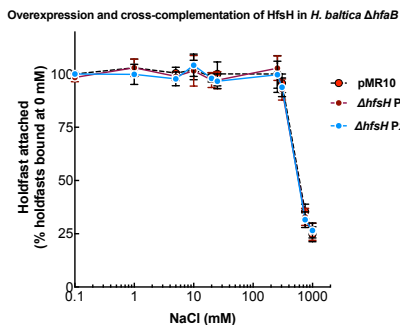

**D**

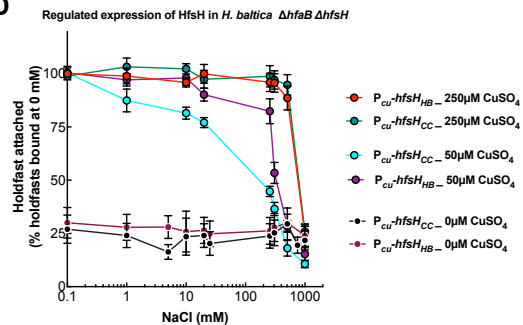

91 **Figure 6: Increased holdfast deacetylation increases holdfast binding in high ionic**  
92 **strength environments**

93 **A.** Schematic of experimental setup. **(B-D).** Cells were grown exponentially for 2 h in PYE with  
94 0.03% xylose (A-B), or 0  $\mu$ M, 50  $\mu$ M, or 250  $\mu$ M  $\text{CuSO}_4$  (C) and shed holdfast were collected from  
95 the culture supernatant. The purified holdfasts were mixed with different concentration of NaCl  
96 and incubated on glass slides for 4 h. The percentage of holdfasts bound per field of view were  
97 quantified at different concentrations of NaCl. The number of holdfasts bound per field of view at  
98 0 mM NaCl was standardized to 100%. Data are expressed as an average of five independent  
99 biological replicates with five technical replicates each. Error bars represent the standard error of  
100 the mean. **B.** Purified holdfasts from *C. crescentus*  $\Delta hfaB$  with pMR10 (empty vector, blue dashed  
101 line) as a control, *C. crescentus*  $\Delta hfaB \Delta hfsH$  complemented with HfsH from *C. crescentus* under  
102 the control of the xylose-inducible promoter ( $P_{xyl_{CC}}-hfsH_{CC}$ , green), *C. crescentus*  $\Delta hfaB \Delta hfsH$   
103 cross-complemented with HfsH from *H. baltica* under the control of the xylose-inducible promoter  
104 ( $P_{xyl_{CC}}-hfsH_{HB}$ , red), and *H. baltica*  $\Delta hfaB$  with pMR10 (empty vector, yellow). **C.** Purified  
105 holdfasts from *H. baltica*  $\Delta hfaB$  with pMR10 (empty vector, black dashed line) as a control, *H.*  
106 *baltica*  $\Delta hfaB \Delta hfsH$  complemented with HfsH<sub>HB</sub> under the control of the xylose-inducible promoter  
107 ( $P_{xyl_{HB}}-hfsH_{HB}$ , maroon), and *H. baltica*  $\Delta hfaB \Delta hfsH$  cross-complemented with HfsH<sub>CC</sub> under the  
108 control of the xylose-inducible promoter ( $P_{xyl_{HB}}-hfsH_{CC}$ , blue). **D.** Purified holdfasts from *H. baltica*  
109  $\Delta hfaB \Delta hfsH$  complemented with HfsH<sub>HB</sub> under the control of the copper inducible promoter ( $P_{Cu}-$   
110  $hfsH_{HB}$ ) and *H. baltica*  $\Delta hfaB \Delta hfsH$  cross-complemented with HfsH<sub>CC</sub> under the control of the  
111 copper inducible promoter ( $P_{Cu}-hfsH_{CC}$ ).  $P_{Cu}-hfsH_{CC}$  was induced with 0  $\mu$ M (black), 50  $\mu$ M (blue),  
112 and 250  $\mu$ M  $\text{CuSO}_4$  (green), and  $P_{Cu}-hfsH_{HB}$  was induced with 0  $\mu$ M (maroon), 50  $\mu$ M (purple),  
113 and 250  $\mu$ M  $\text{CuSO}_4$  (red).

114

115

**Figure 7: HfsH expression is required for interaction of holdfast thiols and galactose monosaccharides with cells**

**A Peptides in *H. baltica* holdfast**

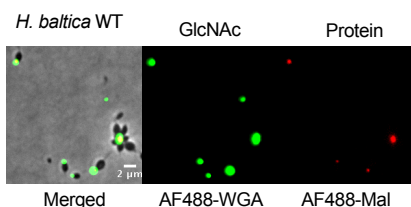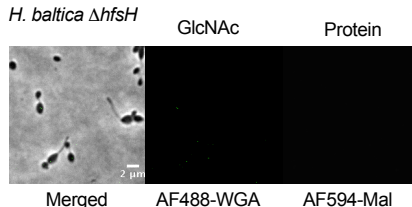

**B Effect of deacetylation on holdfast proteins**

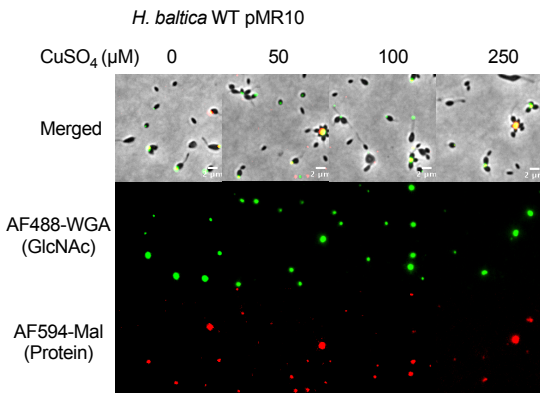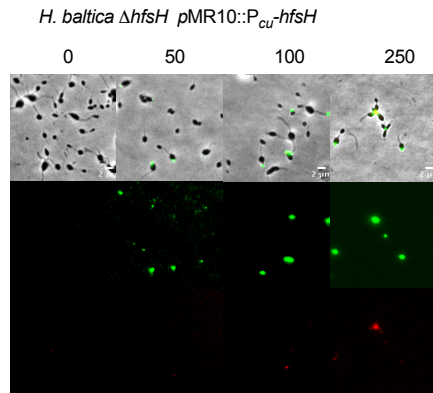

**C *H. baltica* holdfast polysaccharides**

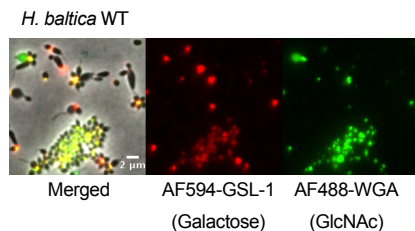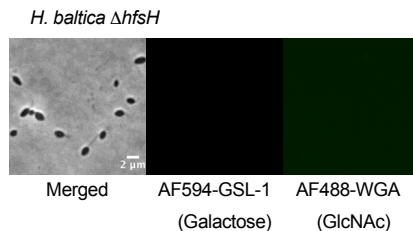

116 **Figure 7: HfsH expression is required for interaction of holdfast thiols and galactose**

117 **monosaccharides with cells**

118 **A.** Representative images showing merged phase and fluorescence channels of *H. baltica* and  
119 *H. baltica*  $\Delta hfsH$  holdfasts co-labeled with AF488-WGA (green, GlcNAc) to label polysaccharides  
120 and AF594-mal (red) to label free thiols. **B.** Representative images of *H. baltica* WT and *H. baltica*  
121  $\Delta hfsH$  complemented with pMR10::P<sub>Cu</sub>-*hfsH*. Holdfasts were co-labeled with AF488-WGA (green)  
122 and AF594-Mal (red). Exponential cultures were induced for 2 h with concentrations of CuSO<sub>4</sub>  
123 ranging from 0 – 250  $\mu$ M. **C.** Representative images showing merged phase and fluorescence  
124 channels of *H. baltica* and *H. baltica*  $\Delta hfsH$  holdfasts co-labeled with AF488-WGA (green) and  
125 AF594-GSL-1 (red) to label GlcNAc and galactose in holdfast, respectively.

126

## Supporting Information

1  
2  
3  
4  
5  
6  
7  
8  
9  
10  
11  
12  
13  
14

### **A polysaccharide deacetylase enhances bacterial adhesion in high ionic strength environments**

Nelson K. Chepkwony and Yves V. Brun\*

Département de microbiologie, infectiologie et immunologie, Université de Montréal, C.P. 6128,  
succ. Centre-ville, Montréal (Québec) H3C 3J7, Canada

Running title: Deacetylation of holdfast polysaccharides augments binding in high ionic strength

\*Address correspondence to Yves V. Brun, [yves.brun@umontreal.ca](mailto:yves.brun@umontreal.ca)

15 **The HfsK acetyltransferase is not required for holdfast adhesion and biofilm formation in**  
16 ***H. baltica***

17 *C. crescentus* HfsK is involved in holdfast modification, although its role is unclear.<sup>1</sup> *C.*  
18 *crescentus*  $\Delta hfsK$  produces holdfasts that are less adhesive, are not cohesive, and are shed into  
19 the medium.<sup>1</sup> In a glass surface binding assay, *C. crescentus*  $\Delta hfsK$  produces holdfasts that  
20 adhere to glass, but fails to anchor cells in place<sup>1</sup> To test whether *hfsK* and its paralogs play a  
21 role in biofilm formation in *H. baltica*, we generated in-frame deletion mutants of *H. baltica* *hfsK*  
22 and its paralogs *hbal\_1607* and *hbal\_1184*. The *H. baltica*  $\Delta hfsK$  mutant showed no defect in  
23 biofilm formation after 12 h incubation at room temperature (Fig. S1A). We observed similar  
24 results for the *H. baltica*  $\Delta hbal_1607$  and the *H. baltica*  $\Delta hbal_1184$  mutants, as well as the triple  
25 deletion mutant *H. baltica*  $\Delta hfsK \Delta hbal_1607 \Delta hbal_1184$  (Fig. S1A). These results indicate that  
26 HfsK and its paralogs are not involved *H. baltica* biofilm formation, in contrast to what has been  
27 reported for *C. crescentus*<sup>1</sup> and *H. baltica* *hfsH* mutant (Fig. S1A).

28 As holdfast is required for biofilm formation in *C. crescentus* and *H. baltica*,<sup>2-4</sup> we probed  
29 for the presence of holdfasts using fluorescent Alexa Fluor 488 (AF488) conjugated wheat germ  
30 agglutinin (WGA) lectin that specifically binds to the GlcNAc component of the holdfast  
31 polysaccharide.<sup>4</sup> In exponentially growing planktonic cultures, *C. crescentus* WT cells produced  
32 holdfasts that bound AF488-WGA and formed cell-cell aggregates mediated by holdfasts, called  
33 rosettes (Fig. S1B, left panel). *C. crescentus*  $\Delta hfsK$  produced holdfasts which variably were  
34 associated with the cell or were shed into the medium (Fig. S1B, left panel, white and blue arrows),  
35 as previously shown.<sup>1</sup> Deletion of *hfsK* in *H. baltica* had no effect on AF488-WGA binding to  
36 holdfast, rosette formation, or holdfast shedding (Fig. S1B), consistent with its lack of an effect on  
37 biofilm formation (Fig. S1A).

38 In order to test whether *H. baltica* HfsK is involved in holdfast anchoring, we spotted  
39 exponentially growing cultures on a glass coverslip and incubated for 1 h at room temperature to  
40 allow for binding to the coverslip. Unbound cells were removed by washing, and AF488-WGA was

41 added to label holdfasts that remained attached to the coverslip. As a control, *C. crescentus* and  
42 *H. baltica* WT cells were incubated with coverslips, and adherent holdfasts were labeled with  
43 AF488-WGA (Fig. S1C). *C. crescentus*  $\Delta hfsK$  holdfasts were bound to coverslips but appeared  
44 to be spread over the surface, covering a greater area than WT and suggesting that they may be  
45 less cohesive (Fig. S1C), in agreement with previous studies.<sup>1</sup> These holdfasts also failed to  
46 anchor *C. crescentus*  $\Delta hfsK$  cells to the surface (3% of WT, Fig. S1C). In comparison, mutants  
47 with deletion of *hfsK* and its paralogs in *H. baltica* produced holdfasts that were bound to the glass  
48 surface and formed rosettes similarly to WT (Fig. S1C right panel). Interestingly, deletion of the  
49 *H. baltica* *hfsK* paralog *hbal\_1184* led to the generation of large cellular aggregates that formed  
50 independently of holdfast biogenesis (Fig. S1D). These cells had morphological defects and were  
51 surrounded by debris that may have resulted from cell lysis, indicating that Hbal\_1184 is likely  
52 involved in a different polysaccharide biosynthetic pathway that contributes to cellular viability.  
53 We conclude that HfsK and its paralogs do not contribute to *H. baltica* holdfast binding properties  
54 under our assay conditions (Fig. S1A-C).

55



## 56 **EXPERIMENTAL PROCEDURES**

### 57 **Bacterial strains and growth conditions**

58           The bacterial strains used in this study are listed in Table S1. *H. baltica* strains were grown  
59 in marine medium (Difco™ Marine Broth/Agar reference 2216) except when studying the effect of  
60 ionic strength on holdfast binding, where they were grown in Peptone Yeast Extract (PYE)  
61 medium<sup>5</sup> supplemented with 0 or 1.5% NaCl. *C. crescentus* was grown in PYE medium. Both *H.*  
62 *baltica* and *C. crescentus* strains were grown at 30 °C. When appropriate, kanamycin was added  
63 at 5 µg/ml to liquid medium and 20 µg/ml in agar plates. *H. baltica* strains with the copper inducible  
64 promoter were grown in marine broth supplemented with 0-250 µM of CuSO<sub>4</sub>. *H. baltica* strains  
65 with the xylose promoter were grown in marine broth supplemented with 0.03% xylose, while *C.*  
66 *crescentus* strains with the xylose promoter were grown in PYE broth supplemented with 0.03%  
67 xylose. *E. coli* strains were grown in lysogeny broth (LB) at 37 °C supplemented with 30 µg/ml of  
68 kanamycin in liquid medium or 25 µg/ml in agar plates, as appropriate.

69

### 70 **Strain construction**

71           All the plasmids and primers used in this study are listed in Table S1 and S2, respectively.  
72 In-frame deletion mutants were obtained by double homologous recombination as previously  
73 described<sup>6</sup> using suicide plasmids transformed into the *H. baltica* host strains by electroporation<sup>7</sup>  
74 followed by sacB sucrose selection. Briefly, genomic DNA was used as the template to PCR-  
75 amplify 500 bp fragments immediately upstream and downstream of the gene to be deleted. The  
76 primers used for amplification were designed with 25 bp overlapping segments for isothermal  
77 assembly<sup>8</sup> using the New England Biolabs NEBuilder tools for ligation into plasmid pNPTS139,  
78 which was digested using EcoRV-HF endonuclease from New England Biolabs. pNPTS139-  
79 based constructs were transformed into  $\alpha$ -select *E. coli* for screening and sequence confirmation  
80 before introduction into the host *C. crescentus* or *H. baltica* strains by electroporation. Introduction  
81 of the desired mutation onto the *C. crescentus* or *H. baltica* genome was verified by sequencing.

82 For gene complementation, the pMR10 plasmid was cut with EcoRV-HF and 500 bp  
83 upstream of the gene of interest containing the promoter, as well as the gene itself, were designed  
84 using New England Biolabs NEBuilder tools and fragments were amplified and ligated into  
85 plasmid pMR10 as described above. The pMR10-based constructs were transformed into  $\alpha$ -  
86 select *E. coli* for screening and sequence confirmation before introduction into the host *C.*  
87 *crescentus* or *H. baltica* strains by electroporation.

88

### 89 **Holdfast labeling using fluorescent lectins**

90 Holdfast labeling with AF488 conjugated lectins (Molecular Probes) was performed as  
91 previously described<sup>2</sup> with the following modifications. Overnight cultures were diluted in fresh  
92 medium to an OD<sub>600</sub> of 0.2 and incubated for 4 h to an OD<sub>600</sub> of 0.6 – 0.8. AF488 conjugated  
93 lectins were added to 100  $\mu$ l of the exponential culture to a final concentration of 0.5  $\mu$ g/ml and  
94 incubated at room temperature for 5 min. 5  $\mu$ l of the labeled culture was spotted onto a glass  
95 cover slide, overlaid with a 1.5 % (w/v) agarose (Sigma-Aldrich) pad in water, and visualized by  
96 epifluorescence microscopy. Imaging was performed using an inverted Nikon Ti-E microscope  
97 with a Plan Apo 60X objective, a GFP/DsRed filter cube, an Andor iXon3 DU885 EM CCD camera,  
98 and Nikon NIS Elements imaging software with 200 ms exposure time. Images were processed  
99 in ImageJ.<sup>9</sup>

100

### 101 **Short-term adherence and biofilm assays**

102 This assay was performed as previously described<sup>2</sup> with the following modifications. For  
103 short-term binding assays, exponential cultures (OD<sub>600</sub> of 0.6 - 0.8) were diluted to an OD<sub>600</sub> of 0.4  
104 in fresh marine broth, added to 24-well plates (1 ml per well), and incubated with shaking (100  
105 rpm) at room temperature for 4 h. For biofilm assays, overnight cultures were diluted to an OD<sub>600</sub>  
106 of 0.1, added to a 24-well plate (1 ml per well), and incubated at room temperature for 12 hours

107 with shaking (100 rpm). In both set-ups,  $OD_{600}$  was measured before the wells were rinsed with  
108 distilled  $H_2O$  to remove non-adherent bacteria, stained using 0.1% crystal violet (CV), and rinsed  
109 again with  $dH_2O$  to remove excess CV. The CV was dissolved with 10% (v/v) acetic acid and  
110 quantified by measuring the absorbance at 600 nm ( $A_{600}$ ). Biofilm formation was normalized to  
111  $A_{600} / OD_{600}$  and expressed as a percentage of WT.

112

### 113 **HfsH expression using a copper inducible promoter**

114 Strains bearing copper inducible plasmids were inoculated from freshly grown colonies  
115 into 5 ml marine broth containing 5  $\mu$ g/ml kanamycin and incubated with shaking (200 rpm) at  
116 30°C overnight. Overnight cultures were diluted in fresh marine broth to  $OD_{600}$  of 0.1 and  
117 incubated until an  $OD_{600}$  of 0.4 was reached, where copper sulfate dissolved in marine broth was  
118 added to a final concentration of 0-250  $\mu$ M. For holdfast labeling, AF488 conjugated lectins were  
119 added to 100  $\mu$ l of exponential culture to a final concentration of 0.5  $\mu$ g/ml and incubated at room  
120 temperature for 5 min. 5  $\mu$ l of the labeled culture was spotted on glass cover slide, overlaid with  
121 a 1.5 % (w/v) agarose (Sigma-Aldrich) pad in water, and visualized by epifluorescence  
122 microscopy. Imaging was performed using an inverted Nikon Ti-E microscope with a Plan Apo  
123 60X objective, a GFP/DsRed filter cube, an Andor iXon3 DU885 EM CCD camera and Nikon NIS  
124 Elements imaging software with 200 ms exposure time. Images were processed in ImageJ.<sup>9</sup>

125 For short term binding and biofilm assays, the induced cultures and controls ( $OD_{600} = 0.4$ )  
126 were incubated with shaking (100 rpm) at room temperature for 4 - 12 h. Then,  $OD_{600}$  was  
127 measured before the wells were rinsed with distilled  $H_2O$  to remove non-adherent bacteria,  
128 stained using 0.1% crystal violet (CV), and rinsed again with  $dH_2O$  to remove excess CV. The CV  
129 was dissolved with 10% (v/v) acetic acid and quantified by measuring the absorbance at 600 nm  
130 ( $A_{600}$ ). Biofilm formation was normalized to  $A_{600} / OD_{600}$  and expressed as a percentage of WT.

131

## 132 **Visualization of holdfasts attached on a glass surface**

133 Visualization of holdfast binding to glass surfaces was performed as described previously<sup>2</sup>  
134 with the following modifications. *H. baltica* and *C. crescentus* strains grown to exponential phase  
135 ( $OD_{600} = 0.4 - 0.6$ ) were incubated on washed glass coverslips at room temperature in a saturated  
136 humidity chamber for 4 - 8 h. After incubation, the slides were rinsed with  $dH_2O$  to remove  
137 unbound cells, holdfasts were labelled using 50  $\mu$ l of fluorescent AF488/594 conjugated lectins at  
138 a concentration of 0.5  $\mu$ g/ml, and cover slides were incubated at room temperature for 5 min.  
139 Then, excess lectin was washed off and the cover slide was topped with a glass coverslip.  
140 Holdfasts were imaged by epifluorescence microscopy using an inverted Nikon Ti-E microscope  
141 with a Plan Apo 60X objective, a GFP/DsRed filter cube, an Andor iXon3 DU885 EM CCD camera  
142 and Nikon NIS Elements imaging software with 200 ms exposure time. Images were processed  
143 in ImageJ.<sup>9</sup>

144

## 145 **Western blot analysis**

146 Cell lysates were prepared from exponentially growing cultures ( $OD_{600} = 0.6-0.8$ ) as  
147 previously described<sup>10</sup> with the following modifications. The equivalent of 1.0 ml of culture at an  
148  $OD_{600}$  of 0.6-0.8 was centrifuged at 16 000  $\times g$  for 5 min at 4 °C. The supernatant was removed,  
149 and cell pellets were resuspended in 50  $\mu$ l of 10mM Tris pH 8.0, followed by the addition of 50  $\mu$ l  
150 of 2x SDS sample buffer. Samples were boiled for 5 min at 100 °C before being run on a 12%  
151 (w/v) polyacrylamide gel and transferred to a nitrocellulose membrane. Membranes were blocked  
152 for 30 min in 5% (w/v) non-fat dry milk in TBST (20 mM Tris, pH 8, 0.05% (w/v) Tween 20), and  
153 incubated at 4 °C overnight with primary antibodies. Anti-FLAG tag and McpA antibodies were  
154 used at a concentration of 1:10 000. Then, a 1:10 000 dilution of secondary antibody, HRP-  
155 conjugated goat anti-rabbit immunoglobulin, was incubated with the membranes at room

156 temperature for 2 h. Membranes were developed with SuperSignal West Dura Substrate (Thermo  
157 Scientific, Rockford, IL).

158

## 159 AUTHOR CONTRIBUTION

160 YVB and NKC designed the research. NKC performed the research. YVB and NKC  
161 analyzed the data. YVB and NKC wrote the paper.

162

## 163 REFERENCE

- 164 1. Sprecher KS, Hug I, Nesper J, Potthoff E, Mahi M-A, Sangermani M, et al. (2017).  
165 Cohesive properties of the *Caulobacter crescentus* holdfast adhesin are regulated by a  
166 novel c-di-GMP effector protein. MBio 8(2):e00294-17.
- 167 2. Chepkwony NK, Berne C, Brun YV. (2019). Comparative analysis of ionic strength  
168 tolerance between freshwater and marine Caulobacterales adhesins. Journal of  
169 bacteriology:JB. 00061-19.
- 170 3. Ong CJ, Wong M, Smit J. (1990). Attachment of the adhesive holdfast organelle to the  
171 cellular stalk of *Caulobacter crescentus*. Journal of bacteriology 172(3):1448-56.
- 172 4. Merker RI, Smit J. (1988). Characterization of the adhesive holdfast of marine and  
173 freshwater caulobacters. Appl Environ Microbiol 54(8):2078-85.
- 174 5. Poindexter JS. (1964). Biological properties and classification of the Caulobacter group.  
175 Bacteriological reviews 28(3):231.
- 176 6. Ried JL, Collmer A. (1987). An nptI-sacB-sacR cartridge for constructing directed,  
177 unmarked mutations in gram-negative bacteria by marker exchange-  
178 mutagenesis. Gene 57(2-3):239-46.
- 179 7. Ely B. [17] Genetics of *Caulobacter crescentus*. Methods in enzymology. 204: Elsevier;  
180 1991. p. 372-84.
- 181 8. Gibson DG, Young L, Chuang R-Y, Venter JC, Hutchison III CA, Smith HO. (2009).  
182 Enzymatic assembly of DNA molecules up to several hundred kilobases. Nature methods  
183 6(5):343.
- 184 9. Schneider CA, Rasband WS, Eliceiri KW. (2012). NIH Image to ImageJ: 25 years of image  
185 analysis. Nature methods 9(7):671.
- 186 10. Wan Z, Brown PJ, Elliott EN, Brun YV. (2013). The adhesive and cohesive properties of a  
187 bacterial polysaccharide adhesin are modulated by a deacetylase. Molecular  
188 microbiology 88(3):486-500.
- 189 11. Toh E, Kurtz HD, Brun YV. (2008). Characterization of the *Caulobacter crescentus*  
190 holdfast polysaccharide biosynthesis pathway reveals significant redundancy in the  
191 initiating glycosyltransferase and polymerase steps. Journal of bacteriology  
192 190(21):7219-31.

- 193 12. Hardy GG, Allen RC, Toh E, Long M, Brown PJ, Cole-Tobian JL, et al. (2010). A localized  
194 multimeric anchor attaches the Caulobacter holdfast to the cell pole. *Molecular*  
195 *microbiology* 76(2):409-27.
- 196 13. Schlesner H, Bartels C, Sittig M, Dorsch M, Stackebrandt E. (1990). Taxonomic and  
197 Phylogenetic Studies on a New Taxon of Budding, Hyphal Proteobacteria, *Hirschia*  
198 *baltica* gen. nov., sp. nov. *International Journal of Systematic and Evolutionary*  
199 *Microbiology* 40(4):443-51.  
200

201 SUPPORTING TABLES

202 TABLE S1: Bacterial strains and plasmids

| Strain or Plasmid                                            | Description and or genotype                                                                                                                                                                                   | Reference or source    |
|--------------------------------------------------------------|---------------------------------------------------------------------------------------------------------------------------------------------------------------------------------------------------------------|------------------------|
| <b><i>E. coli</i></b>                                        |                                                                                                                                                                                                               |                        |
| $\alpha$ select                                              | F <sup>-</sup> <i>deoR endA1 relA1 gyrA96 hsdR17(rk m<sub>k</sub>) supE44 thi-1 <math>\Delta</math>(lacZYA-argFV169) <math>\phi</math>80<math>\Delta</math>lac<math>\Delta</math>M15 <math>\lambda</math></i> | Bioline                |
| BL21(DE3)                                                    | F <sup>-</sup> <i>ompT hsdSB (rB-mB-) gal dcm (<math>\lambda</math>DE3)</i>                                                                                                                                   | New England Biolabs    |
| YB8435                                                       | $\alpha$ select /pNPTS139 $\Delta$ <i>hfsH</i>                                                                                                                                                                | This study             |
| YB8432                                                       | $\alpha$ select /pNPTS139 $\Delta$ <i>hfaB</i>                                                                                                                                                                | <sup>2</sup>           |
| YB8428                                                       | $\alpha$ select/ pMR10::Pcu- <i>hfsH<sub>HB</sub></i>                                                                                                                                                         | This study             |
| YB9329                                                       | $\alpha$ select/ pMR10::Pcu- <i>hfsH<sub>CC</sub></i>                                                                                                                                                         | This study             |
| YB9328                                                       | BL21/ pET28a: <i>hfsH<sub>CC</sub></i> -His                                                                                                                                                                   | This study             |
| YB9327                                                       | BL21/ pET28a: <i>hfsH<sub>HB</sub></i> -His                                                                                                                                                                   | This study             |
| YB8444                                                       | $\alpha$ select/ pMR10::P <i>hfsE<sub>CC</sub></i> - <i>hfsH<sub>HB</sub></i>                                                                                                                                 | This study             |
| YB8443                                                       | $\alpha$ select/ pMR10::P <i>hfsE<sub>HB</sub></i> - <i>hfsH<sub>CC</sub></i>                                                                                                                                 | This study             |
| YB9535                                                       | $\alpha$ select/ pMR10::P <i>hfsE<sub>HB</sub></i> - <i>hfsH<sub>HB</sub></i>                                                                                                                                 | This study             |
| YB217                                                        | $\alpha$ select/ pMR10::P <i>xyI<sub>CC</sub></i> - <i>hfsH<sub>CC</sub></i>                                                                                                                                  | This study             |
| YB9536                                                       | $\alpha$ select/ pMR10::P <i>xyI<sub>CC</sub></i> - <i>hfsH<sub>HB</sub></i>                                                                                                                                  | This study             |
| YB9537                                                       | $\alpha$ select/ pMR10::P <i>xyI<sub>HB</sub></i> - <i>hfsH<sub>CC</sub></i>                                                                                                                                  | This study             |
| YB214                                                        | $\alpha$ select/ pMR10::P <i>xyI<sub>HB</sub></i> - <i>hfsH<sub>HB</sub></i>                                                                                                                                  | This study             |
| <b><i>C. crescentus</i></b>                                  |                                                                                                                                                                                                               |                        |
| YB135                                                        | WT strain CB15                                                                                                                                                                                                | <sup>5</sup>           |
| YB9531                                                       | WT CB15 pMR10                                                                                                                                                                                                 | This study             |
| YB2198                                                       | CB15 $\Delta$ <i>hfsH</i>                                                                                                                                                                                     | <sup>11</sup>          |
| YB8662                                                       | CB15 $\Delta$ <i>hfsK</i>                                                                                                                                                                                     | <sup>1</sup>           |
| YB4251                                                       | CB15 $\Delta$ <i>hfaB</i>                                                                                                                                                                                     | <sup>12</sup>          |
| YB9532                                                       | CB15 $\Delta$ <i>hfaB</i> pMR10                                                                                                                                                                               | This study             |
| YB9540                                                       | CB15 $\Delta$ <i>hfsH</i> pMR10::P <i>hfsE<sub>CC</sub></i> - <i>hfsH<sub>CC</sub></i>                                                                                                                        | <sup>11</sup>          |
| YB9534                                                       | CB15 $\Delta$ <i>hfsH</i> pMR10::P <i>hfsE<sub>CC</sub></i> - <i>hfsH<sub>HB</sub></i>                                                                                                                        | This study             |
| YB6887                                                       | CB15 $\Delta$ <i>hfsH</i> pMR10::P <i>xyI<sub>CC</sub></i> - <i>hfsH<sub>CC</sub></i>                                                                                                                         | <sup>10</sup>          |
| YB221                                                        | CB15 $\Delta$ <i>hfsH</i> pMR10::P <i>xyI<sub>CC</sub></i> - <i>hfsH<sub>HB</sub></i>                                                                                                                         | This study             |
| YB9533                                                       | CB15 $\Delta$ <i>hfaB</i> $\Delta$ <i>hfsH</i>                                                                                                                                                                | This study             |
| YB9538                                                       | CB15 $\Delta$ <i>hfaB</i> $\Delta$ <i>hfsH</i> pMR10::P <i>xyI<sub>CC</sub></i> - <i>hfsH<sub>CC</sub></i>                                                                                                    | This study             |
| YB223                                                        | CB15 $\Delta$ <i>hfaB</i> $\Delta$ <i>hfsH</i> pMR10::P <i>xyI<sub>CC</sub></i> - <i>hfsH<sub>HB</sub></i>                                                                                                    | This study             |
| <b><i>H. baltica</i></b>                                     |                                                                                                                                                                                                               |                        |
| YB5842                                                       | WT strain                                                                                                                                                                                                     | <sup>13</sup>          |
| YB8438                                                       | WT pMR10                                                                                                                                                                                                      | <sup>2</sup>           |
| YB8404                                                       | YB5842 $\Delta$ <i>hfsA</i>                                                                                                                                                                                   | <sup>2</sup>           |
| YB8415                                                       | YB5842 $\Delta$ <i>hfsH</i>                                                                                                                                                                                   | This study             |
| YB9326                                                       | YB5842 D43A <i>hfsH</i>                                                                                                                                                                                       | This study             |
| YB8406                                                       | YB5842 $\Delta$ <i>hfaB</i>                                                                                                                                                                                   | <sup>2</sup>           |
| YB8412                                                       | YB5842 $\Delta$ <i>hbaL</i> 1607                                                                                                                                                                              | This study             |
| YB8419                                                       | YB5842 $\Delta$ <i>hbaL</i> <i>hfsK</i>                                                                                                                                                                       | This study             |
| YB9541                                                       | YB5842 $\Delta$ <i>hbaL</i> 1184                                                                                                                                                                              | This study             |
| YB9542                                                       | YB5842 $\Delta$ <i>hfsK</i> $\Delta$ <i>hbaL</i> 1607                                                                                                                                                         | This study             |
| YB9543                                                       | YB5842 $\Delta$ <i>hfsK</i> $\Delta$ <i>hbaL</i> 1184                                                                                                                                                         | This study             |
| YB9544                                                       | YB5842 $\Delta$ <i>hfsK</i> $\Delta$ <i>hbaL</i> 1184 $\Delta$ <i>hbaL</i> 1607                                                                                                                               | This study             |
| YB8417                                                       | YB5842 $\Delta$ <i>hfaB</i> pMR10                                                                                                                                                                             | <sup>2</sup>           |
| YB8416                                                       | YB5842 $\Delta$ <i>hfaB</i> $\Delta$ <i>hfsH</i>                                                                                                                                                              | This study             |
| YB9318                                                       | YB5842 $\Delta$ <i>hfsH</i> pMR10::Pcu- <i>hfsH<sub>CC</sub></i>                                                                                                                                              | This study             |
| YB8422                                                       | YB5842 $\Delta$ <i>hfsH</i> pMR10::Pcu- <i>hfsH<sub>HB</sub></i>                                                                                                                                              | This study             |
| YB8423                                                       | YB5842 $\Delta$ <i>hfsH</i> pMR10::P <i>hfsE<sub>HB</sub></i> - <i>hfsH<sub>CC</sub></i>                                                                                                                      | This study             |
| YB8421                                                       | YB5842 $\Delta$ <i>hfsH</i> pMR10::P <i>hfsE<sub>HB</sub></i> - <i>hfsH<sub>HB</sub></i>                                                                                                                      | This study             |
| YB8420                                                       | YB5842 $\Delta$ <i>hfsH</i> pMR10::P <i>xyI<sub>HB</sub></i> - <i>hfsH<sub>CC</sub></i>                                                                                                                       | This study             |
| YB218                                                        | YB5842 $\Delta$ <i>hfsH</i> pMR10::P <i>xyI<sub>HB</sub></i> - <i>hfsH<sub>HB</sub></i>                                                                                                                       | This study             |
| YB222                                                        | YB5842 $\Delta$ <i>hfaB</i> $\Delta$ <i>hfsH</i> pMR10::P <i>xyI<sub>HB</sub></i> - <i>hfsH<sub>CC</sub></i>                                                                                                  | This study             |
| YB219                                                        | YB5842 $\Delta$ <i>hfaB</i> $\Delta$ <i>hfsH</i> pMR10::P <i>xyI<sub>HB</sub></i> - <i>hfsH<sub>HB</sub></i>                                                                                                  | This study             |
| YB9539                                                       | YB5842 $\Delta$ <i>hfaB</i> $\Delta$ <i>hfsH</i> pMR10::Pcu- <i>hfsH<sub>CC</sub></i>                                                                                                                         | This study             |
| YB185                                                        | YB5842 $\Delta$ <i>hfaB</i> $\Delta$ <i>hfsH</i> pMR10::Pcu- <i>hfsH<sub>HB</sub></i>                                                                                                                         | This study             |
| YB9332                                                       | YB5842 $\Delta$ <i>hfsH</i> pMR10::Pcu- <i>hfsH<sub>HB</sub></i> -X3FLAG                                                                                                                                      | This study             |
| YB9331                                                       | YB5842 $\Delta$ <i>hfsH</i> pMR10::Pcu- <i>hfsH<sub>CC</sub></i> -X3FLAG                                                                                                                                      | This study             |
| <b>Plasmids</b>                                              |                                                                                                                                                                                                               |                        |
| pET28a(+)                                                    | Vector carrying an N- and C-terminal His-tag/ thrombin/T7-tag for protein overexpression                                                                                                                      | Novagen                |
| pET28a <i>hfsH<sub>CC</sub></i>                              | Protein overexpression vector that carries the <i>hfsH<sub>CC</sub></i>                                                                                                                                       | This study             |
| pET28a <i>hfsH<sub>HB</sub></i>                              | Protein overexpression vector that carries the <i>hfsH<sub>HB</sub></i>                                                                                                                                       | This study             |
| pMR10                                                        | Mini-RK2 cloning vector; RK2 replication and stabilization functions                                                                                                                                          | R. Roberts and C. Mohr |
| pMR10::Pcu- <i>hfsH<sub>HB</sub></i>                         | pMR10 containing <i>hfsH<sub>HB</sub></i> under copper inducible promoter                                                                                                                                     | This study             |
| pMR10::Pcu- <i>hfsH<sub>CC</sub></i>                         | pMR10 containing <i>hfsH<sub>CC</sub></i> under copper inducible promoter                                                                                                                                     | This study             |
| pMR10::P <i>hfsE<sub>CC</sub></i> - <i>hfsH<sub>CC</sub></i> | Complementation vector that carries <i>hfsH<sub>CC</sub></i> under its native promoter                                                                                                                        | This study             |
| pMR10::P <i>hfsE<sub>HB</sub></i> - <i>hfsH<sub>CC</sub></i> | Complementation vector that carries <i>hfsH<sub>CC</sub></i> under its <i>H. baltica</i> native promoter                                                                                                      | This study             |
| pMR10::P <i>hfsE<sub>CC</sub></i> - <i>hfsH<sub>HB</sub></i> | Complementation vector that carries <i>hfsH<sub>HB</sub></i> under its <i>C. crescentus</i> native promoter                                                                                                   | This study             |
| pMR10::P <i>hfsE<sub>HB</sub></i> - <i>hfsH<sub>HB</sub></i> | Complementation vector that carries <i>hfsH<sub>HB</sub></i> under its native promoter                                                                                                                        | This study             |
| pMR10::Pcu- <i>hfsH<sub>HB</sub></i> -X3FLAG                 | Triple FLAG tagged <i>HfsH<sub>HB</sub></i>                                                                                                                                                                   | This study             |
| pMR10::Pcu- <i>hfsH<sub>CC</sub></i> -X3FLAG                 | Triple FLAG tagged <i>HfsH<sub>CC</sub></i>                                                                                                                                                                   | This study             |
| pNPTS139                                                     | pLitmus 39 derivative, <i>oriT</i> , <i>sacB</i> , Kan <sup>r</sup>                                                                                                                                           | This study             |
| pNPTS139 $\Delta$ <i>hfsH</i>                                | pNPTS139 containing 500 bp fragments upstream and downstream of <i>hfsH</i>                                                                                                                                   | This study             |
| pNPTS139 $\Delta$ <i>hfaB</i>                                | pNPTS139 containing 500 bp fragments upstream and downstream of <i>hfaB</i>                                                                                                                                   | <sup>2</sup>           |





207 **SUPPORTING FIGURES AND FIGURE LEGENDS**

208 **Figure S1: The HfsK acetyltransferase is not required for holdfast adhesion and biofilm**

209 **formation in *H. baltica***

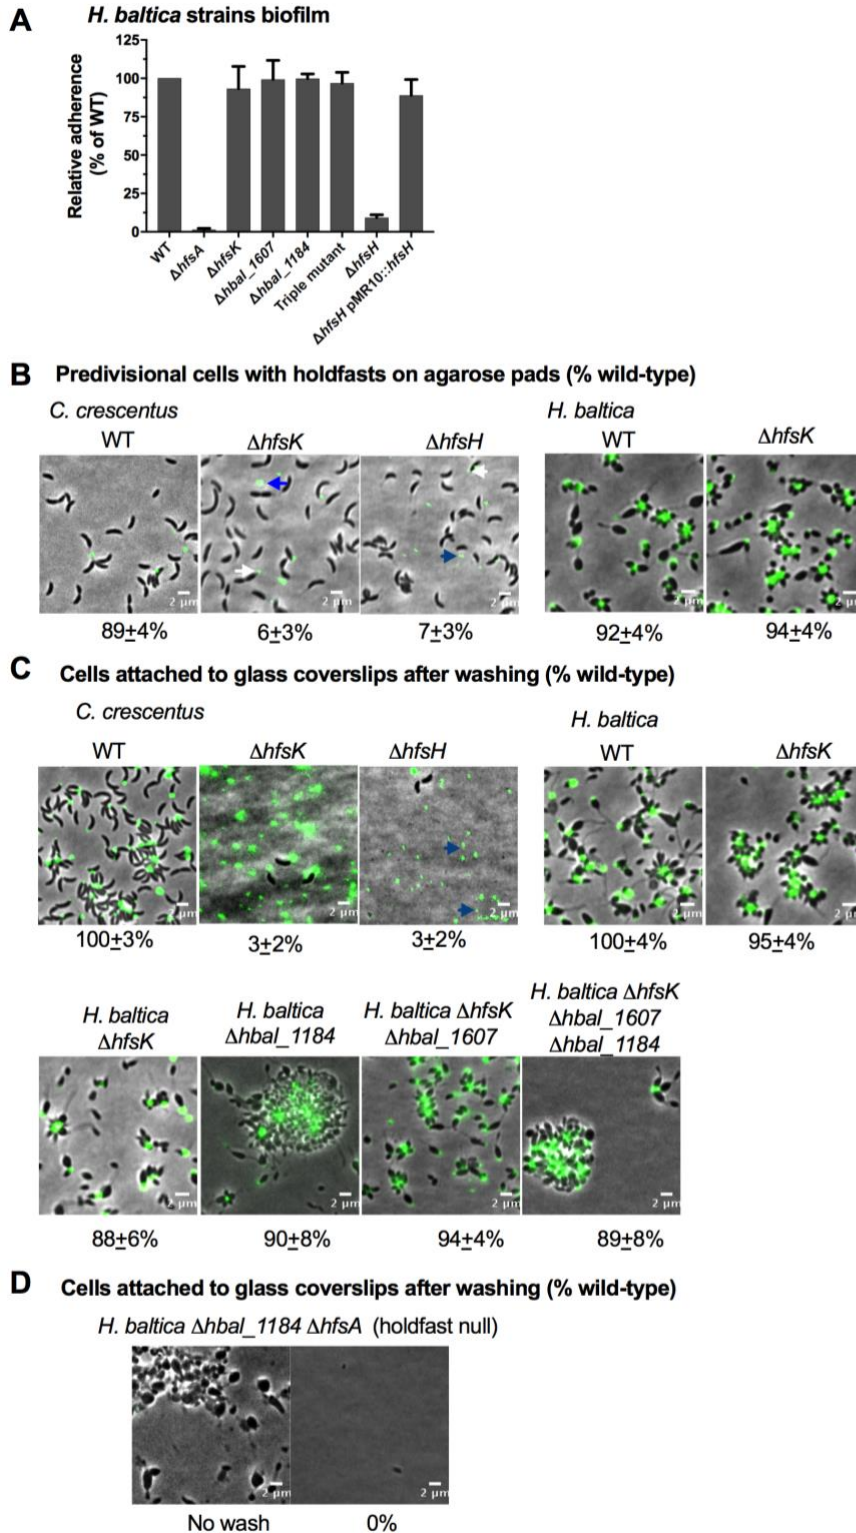

212 **Figure S1: The HfsK acetyltransferase is not required for holdfast adhesion and biofilm**  
213 **formation in *H. baltica***

214 **A.** Quantification of biofilm formation by the crystal violet assay after incubation for 12 h,  
215 expressed as a mean percent of WT crystal violet staining. Holdfast null strain  $\Delta hfsA$  was used  
216 as a negative control. Error is expressed as the standard error of the mean of three independent  
217 biological replicates with four technical replicates each. The triple mutant is *H. baltica*  $\Delta hfsK$   
218  $\Delta hbal\_1607$   $\Delta hbal\_1184$ . **B.** Representative images showing merged phase and fluorescence  
219 channels of the indicated *C. crescentus* and *H. baltica* strains on agarose pads. Holdfast is labeled  
220 with AF488-WGA (green). White arrows indicate holdfasts attached to the  $\Delta hfsH$  and  $\Delta hfsK$  cells,  
221 and blue arrows indicate holdfast shed into the medium. Exponential planktonic cultures were  
222 used to quantify the percentage of predivisional cells with holdfast. Data are expressed as the  
223 mean of three independent biological replicates with four technical replicates each. Error bars  
224 represent the standard error of the mean. A total of 3,000 cells were quantified per replicate using  
225 MicrobeJ (Images for the WT and *hfsH* are from Fig. 2). **C-D.** Representative images showing  
226 merged phase and fluorescence channels of *C. crescentus* and *H. baltica* strains bound to a glass  
227 coverslip. Exponential cultures were incubated on the glass slides for 1 h, washed to remove  
228 unbound cells, and holdfast were labelled with AF488-WGA (green). Blue arrows indicate surface-  
229 bound holdfasts shed by *hfsH* mutants. The data showing quantification of cells bound to the  
230 glass coverslip are the mean of two biological replicates with five technical replicates each. Error  
231 is expressed as the standard error of the mean using MicrobeJ (Images for the WT and *hfsH* are  
232 from Fig. 2).

233

234 **Figure S2: *H. baltica* and *C. crescentus* holdfast modification enzymes HfsK and HfsH.**

**A** Complementation of HfsH mutants on agarose pads (% predivisional cells with holdfast)

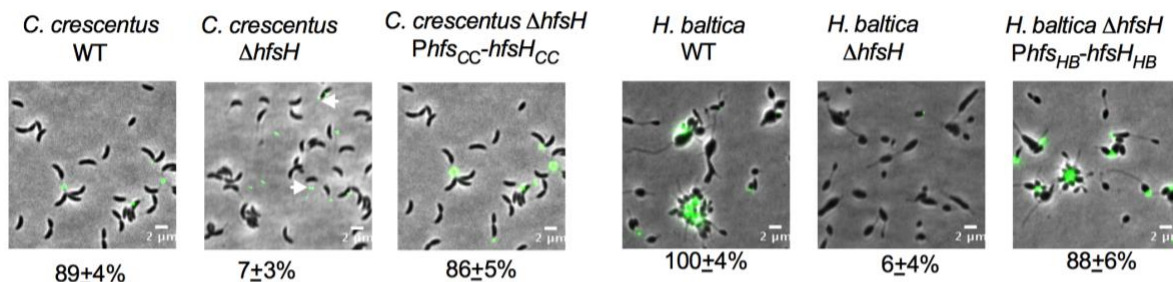

**B** *C. crescentus* holdfast WGA fluorescent area

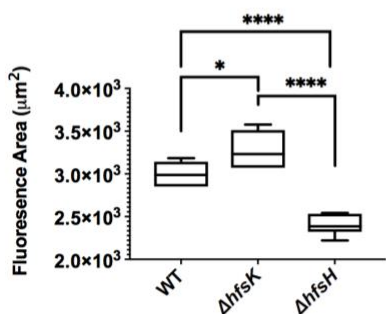

**D** *H. baltica* HfsH expression

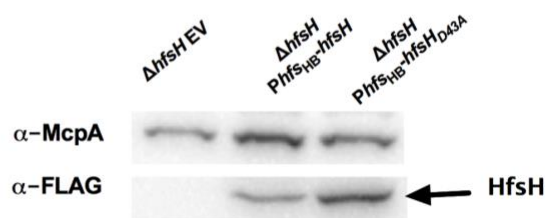

**C** HfsH sequence alignment

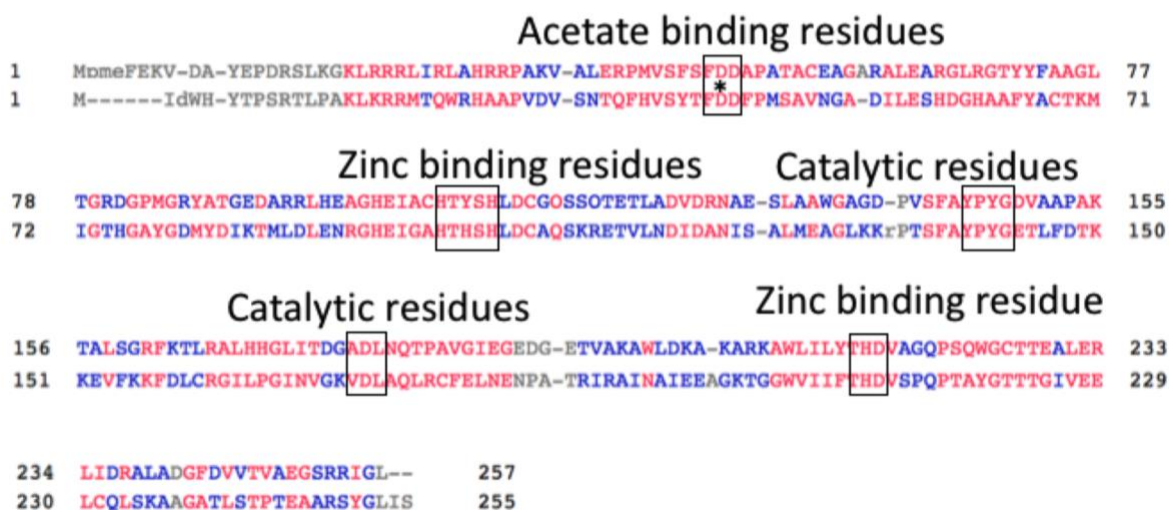

235 **Figure S2: *H. baltica* and *C. crescentus* modification enzymes HfsK and HfsH.**

236 **A.** Images showing merged phase and fluorescence channels of the indicated strains of *C.*  
237 *crescentus* (left) and *H. baltica* (right). Holdfast is labeled with AF488-WGA (green).

238 Exponential planktonic cultures were used to quantify the percentage of predivisional cells with  
239 holdfast. Data is expressed as the mean of three independent biological replicates with four  
240 technical replicates each. Error bars represent the standard error of the mean. **B.** Box plot

241 showing the area of AF488-WGA fluorescence from holdfast produced by *C. crescentus* strains.  
242 Data is the mean of four biological replicates. The horizontal bar represents the median, the box  
243 represents 25<sup>th</sup> and 75<sup>th</sup> percentile, and the whiskers represent the full range of data. \* and \*\*\*

244 represent *P values* <0.1 and <0.0001 **C.** Alignment of the *C. crescentus* and *H. baltica* HfsH  
245 amino acid sequences with conserved carbohydrate esterase family 4 (CE4) motifs indicated by  
246 rectangles. The conserved residue involved in acetate binding is indicated with an asterisk (D48  
247 in *C. crescentus* HfsH and D43 in *H. baltica* HfsH). **D.** Western blots of whole cell lysates of the  
248 indicated strains showing the expression level of FLAG-tag fusions of HfsH and HfsH<sub>D43A</sub>. McpA  
249 levels were monitored as a loading control.

250

251

252

253 **Figure S3: HfsH expression using a copper inducible promoter ( $P_{Cu}$ ) in *H. baltica***  
254

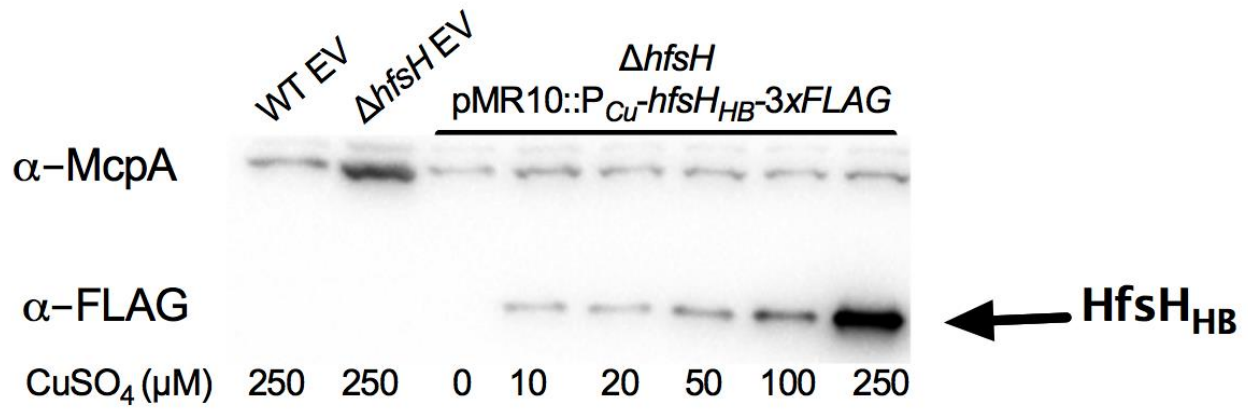

255 **Figure S3: HfsH expression using a copper inducible promoter ( $P_{Cu}$ ) in *H. baltica***

256 Western blots of whole cell lysates showing the expression levels of FLAG-tagged HfsH under  
257 the control of the copper inducible promoter after 4 h of induction with 0 – 250  $\mu$ M  $CuSO_4$ . McpA  
258 levels were monitored as a loading control.

259

260 **Figure S4: Levels of HfsH<sub>HB</sub> and HfsH<sub>CC</sub> expression using *Phfs* and *Pxyl* promoters in *H.***  
261 ***baltica***

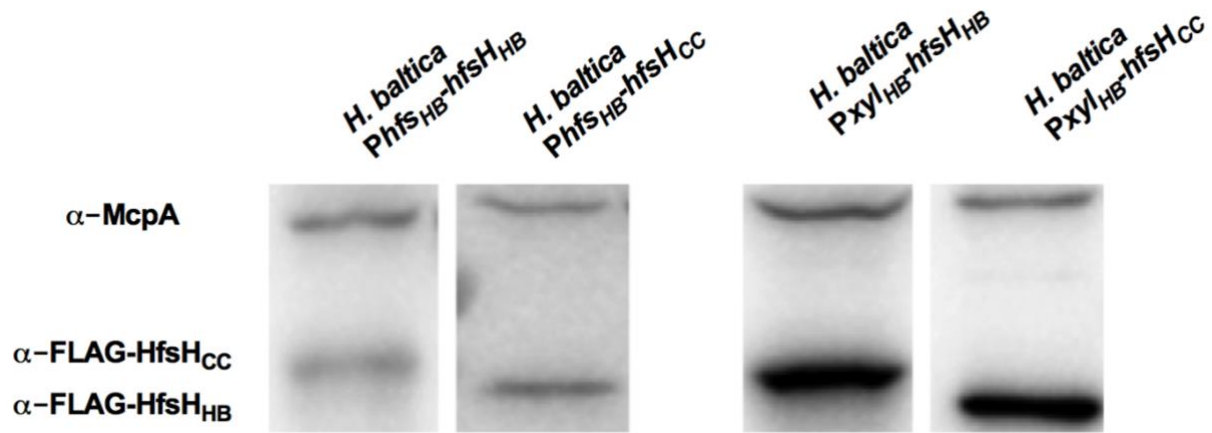

262

263 **Figure S4: Levels of HfsH<sub>HB</sub> and HfsH<sub>CC</sub> expression using *Phfs* and *PxyI* promoters in *H.***

264 ***baltica***

265 Western blots of whole cell lysates showing the expression levels of FLAG-tagged HfsH<sub>HB</sub> and

266 HfsH<sub>CC</sub> under the control of native holdfast synthesis (*Phfs*) and xylose-inducible (*PxyI*) promoters

267 after 4 h of induction with 0.03% xylose. McpA levels were monitored as a loading control.

268

269



270 **Figure S5: Cross-complementation of HfsH<sub>HB</sub> and HfsH<sub>CC</sub> using the copper inducible**  
271 **promoter**

**A** WGA fluorescent intensity of holdfast decetylated by HfsH<sub>HB</sub> and HfsH<sub>CC</sub> in *H. baltica* with 50  $\mu$ M CuSO<sub>4</sub>

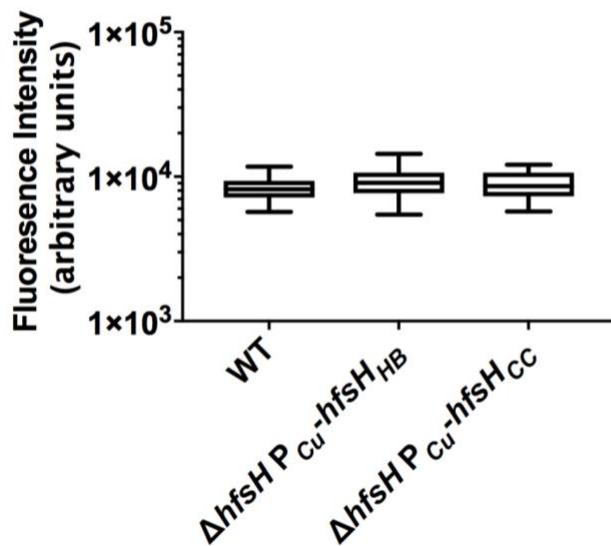

**B** HfsH<sub>CC</sub> and HfsH<sub>HB</sub> expression using a copper inducible promoter

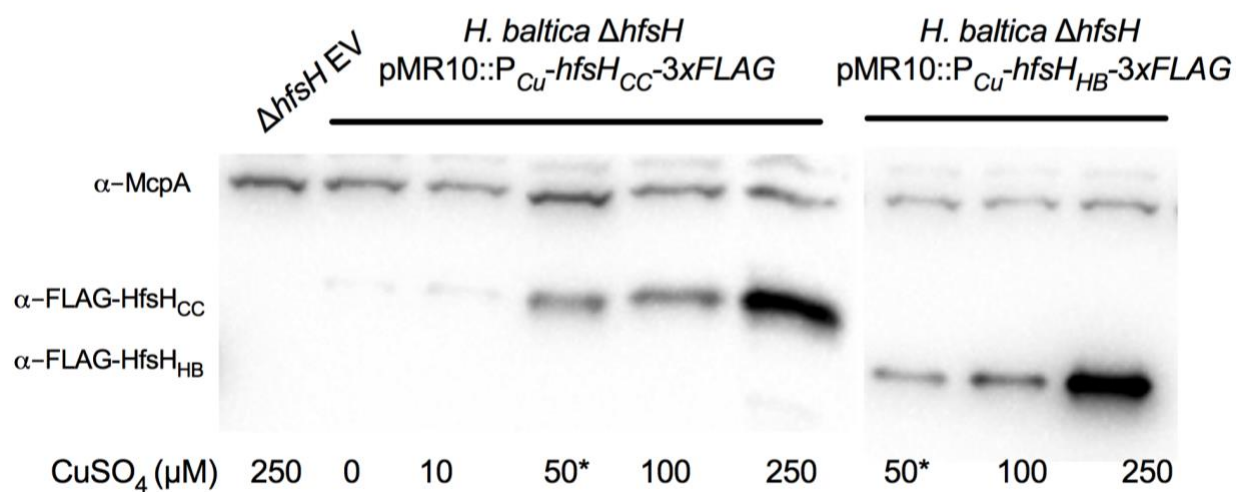

272

273

274 **Figure S5: Cross-complementation of HfsH<sub>HB</sub> and HfsH<sub>CC</sub> using the copper inducible**  
275 **promoter**

276 **A.** Box plot showing the integrated intensity of AF488-WGA fluorescence from holdfast produced  
277 by *H. baltica*  $\Delta hfsH$  pMR10::P<sub>Cu</sub>-*hfsH*<sub>HB</sub> and cross-complemented *H. baltica*  $\Delta hfsH$  pMR10::P<sub>Cu</sub>-  
278 *hfsH*<sub>CC</sub> at 50  $\mu$ M CuSO<sub>4</sub> induction for 4 h. Data is the mean of four biological replicates. The  
279 horizontal bar represents the median, the box represents 25<sup>th</sup> and 75<sup>th</sup> percentile, and the  
280 whiskers represent the full range of data. **B.** Western blots of whole cell lysates showing the  
281 expression level of FLAG-tagged HfsH<sub>HB</sub> and HfsH<sub>CC</sub> under the control of the copper inducible  
282 promoter after 4 h of induction with 0 – 250  $\mu$ M CuSO<sub>4</sub>. McpA levels were monitored as a loading  
283 control. The star indicates HfsH induction at 50  $\mu$ M CuSO<sub>4</sub>, used in comparing *H. baltica* and *C.*  
284 *crescentus* holdfast binding.

285

286 **SUPPORTING MOVIE LEGENDS**

287 **Movie S1**

288 **A-B.** Time-lapse video of *H. baltica* WT and *H. baltica*  $\Delta hfsH$  on soft agarose pads. Exponential  
289 cultures were placed on soft agarose pads containing holdfast-specific AF488-WGA (green) and  
290 covered with a glass coverslip. Images were collected every 5 min for 12 h. **C-D.** Time-lapse video  
291 of *H. baltica* WT and *H. baltica*  $\Delta hfsH$  in microfluidic channels. Exponential cultures with holdfast-  
292 specific AF488-WGA (green) were injected into the microfluidic chambers and flow was turned  
293 off. Images were collected every 20 sec for 5.5 h.

294  
295 **Movie S2**

296 **A-C.** Time-lapse videos of *H. baltica*  $\Delta hfsH$  pMR10::P<sub>Cu</sub>-*hfsH* in microfluidic channels with holdfast  
297 labeled with AF488-WGA (green). Exponential cultures were induced with 0  $\mu$ M, 50  $\mu$ M, or 250  
298  $\mu$ M CuSO<sub>4</sub>, mixed with AF488-WGA, injected into the microfluidic chambers, and allowed to bind  
299 for 30 min. Thereafter, the flow rate was adjusted to 1.4 ul/min. Images were collected every 20  
300 sec for 1 h.

301

# Figure 1: Cell cycle and holdfast synthesis of *C. crescentus* and *H. baltica*

## A *C. crescentus* cell cycle and holdfast synthesis



## B *H. baltica* cell cycle and holdfast synthesis



**Figure 2: The role of HfsH and HfsK in *H. baltica* holdfast biogenesis**

**A Holdfast genes**



**B *H. baltica* strains biofilm**



**C Predivisional cells with holdfasts on agarose pads (% wild-type)**

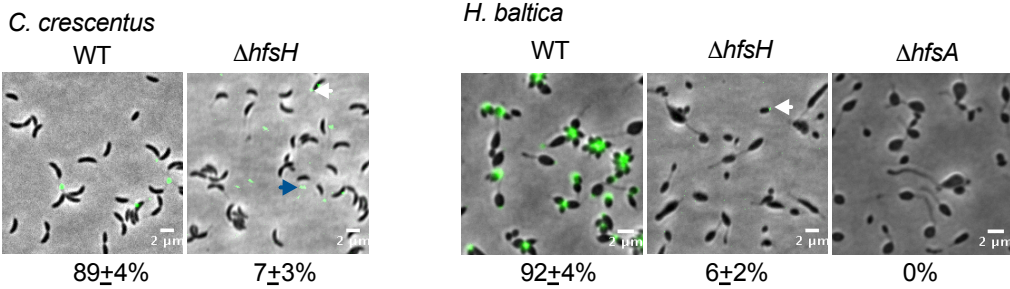

**D Cells attached to glass coverslips after washing (% wild-type)**

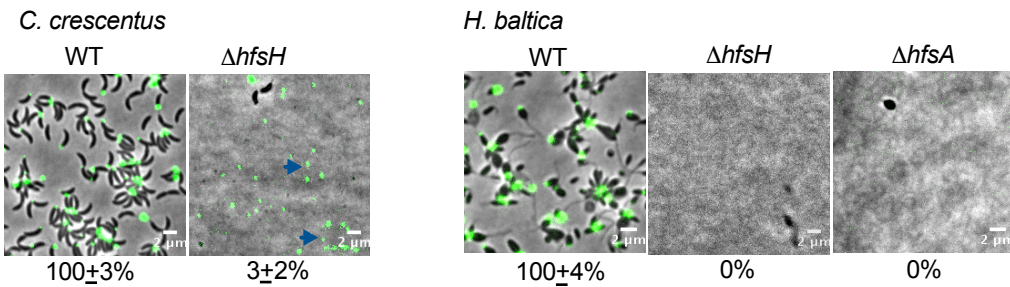

**E *H. baltica***

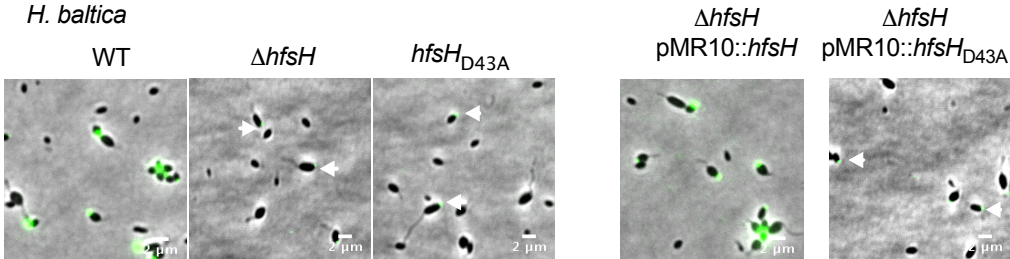

**Figure 3: *H. baltica* *hfsH* mutant holdfasts forms thread-like fibers that diffuse into the medium**

**A Time-lapse on soft agarose pads**

*H. baltica* WT



*H. baltica*  $\Delta$ *hfsH*



**B Time-lapse on glass coverslip surface**

*H. baltica* WT

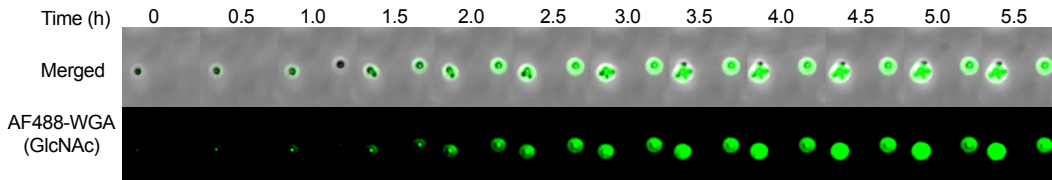

*H. baltica*  $\Delta$ *hfsH*



**Figure 4: HfsH expression correlates to the level of biofilm formation**

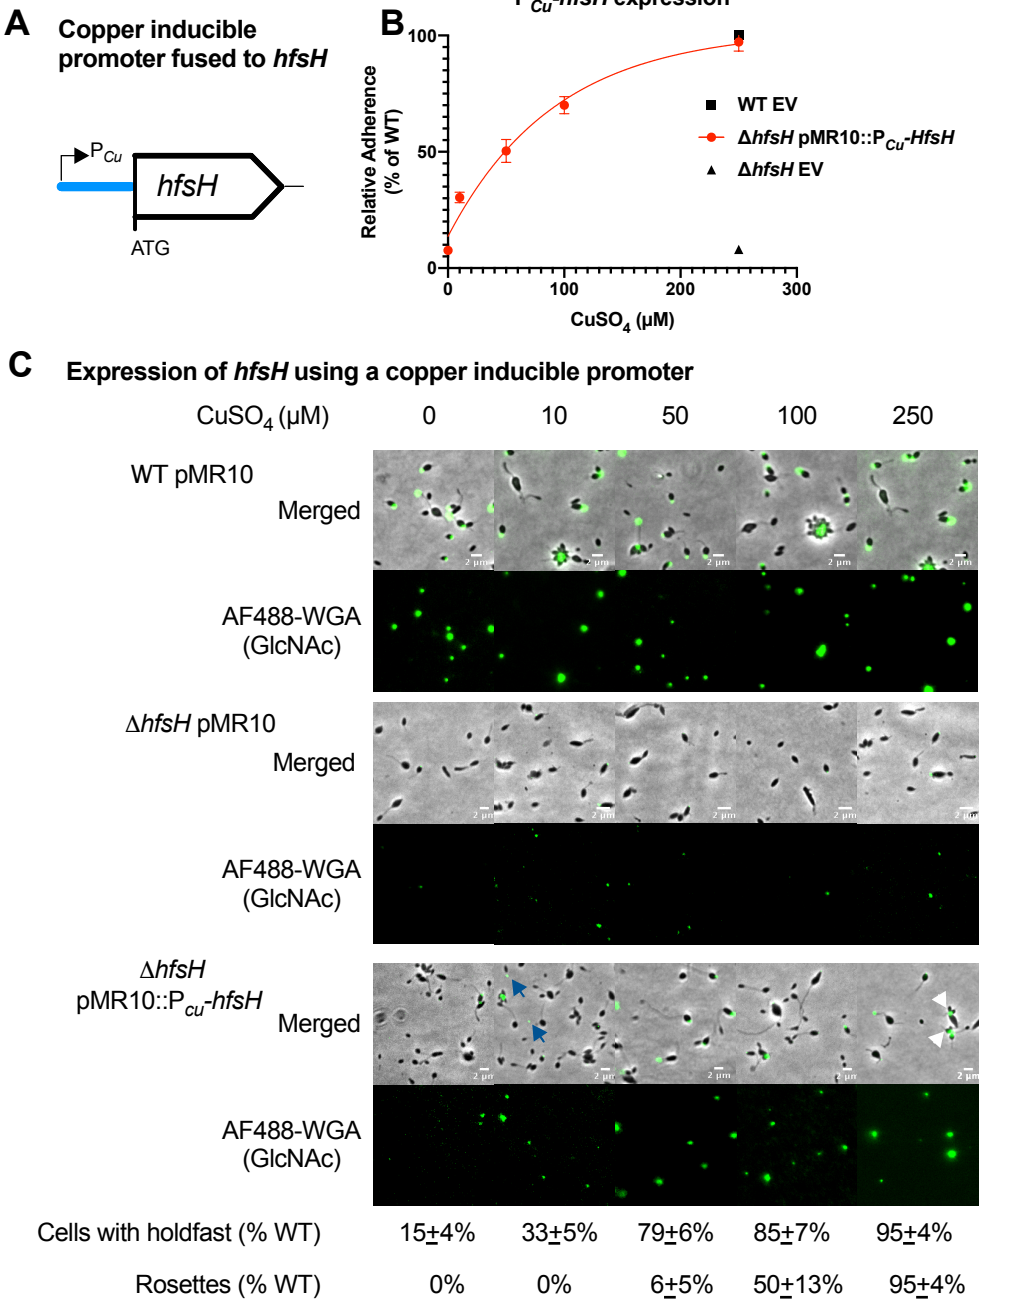

**D** Time-lapse on glass surface  $\Delta hfsH$  pMR10:: $P_{Cu}$ -*hfsH*

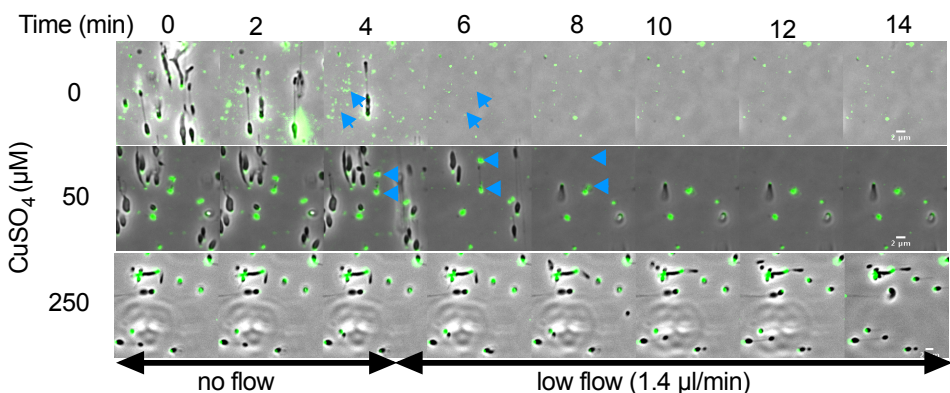

**Figure 5: Overexpression of HfsH increases biofilm formation in *C. crescentus* but not *H. baltica***





# Figure 6: Increased HfsH expression increases holdfast binding in high ionic strength environments

**A**



**B**

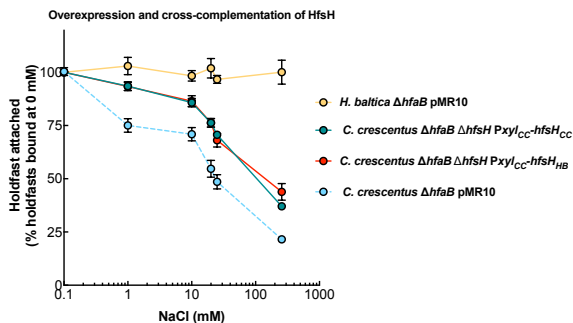

**C**

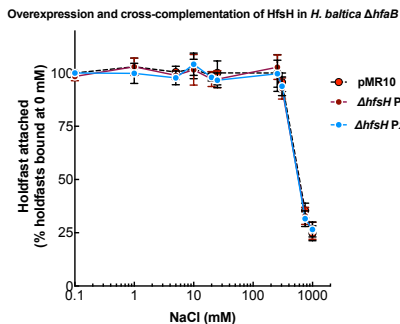

**D**

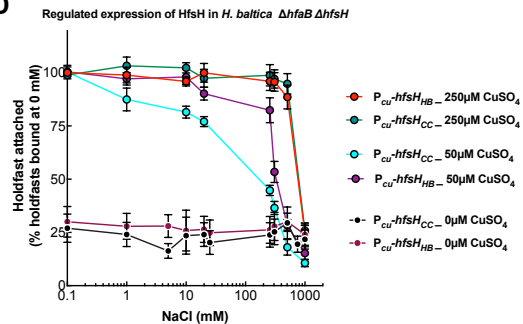

**Figure 7:** HfsH expression is required for interaction of holdfast thiols and galactose monosaccharides with cells

**A** Peptides in *H. baltica* holdfast

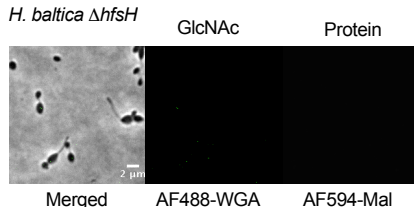

**B** Effect of deacetylation on holdfast proteins

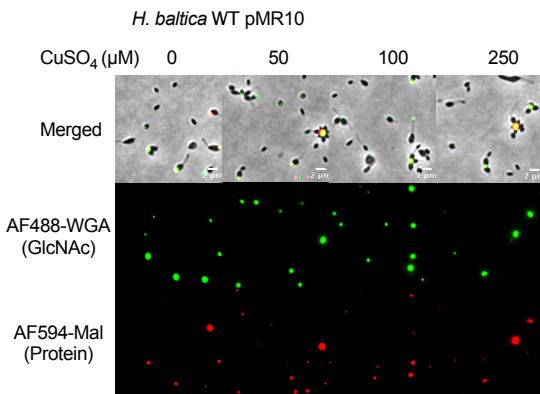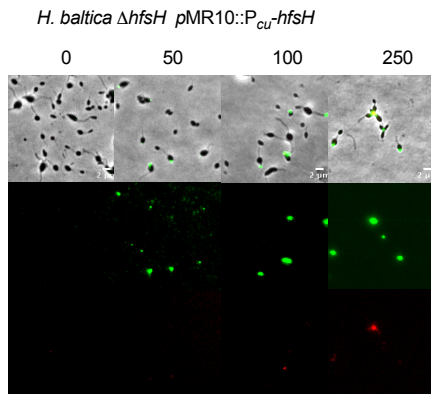

**C** *H. baltica* holdfast polysaccharides

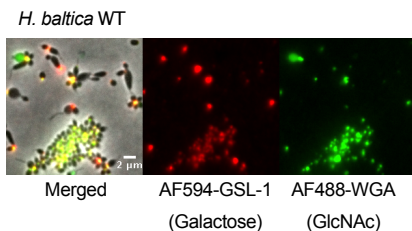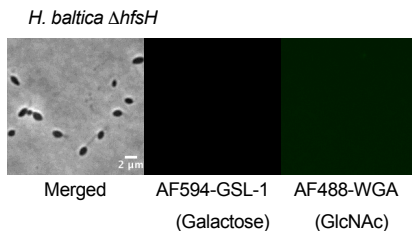

Source: http://biorxiv.org/content/10.1101/2021.04.16.440180v1.full.pdf
